Tobias-Hünefeldt et al. Metabolic profiling of NZ fjords

1 **Metabolic profiling suggests two sources of organic matter shape microbial activity, but**  
2 **not community composition, in New Zealand fjords**

3

4 Sven P. Tobias-Hünefeldt<sup>1</sup>, Stephen R. Wing<sup>2</sup>, Federico Baltar<sup>2,3,\*</sup> and Sergio E. Morales<sup>1,\*</sup>

5

6 <sup>1</sup>Department of Microbiology and Immunology, University of Otago, PO Box 56, Dunedin  
7 9054, New Zealand

8 <sup>2</sup>Department of Marine Science, University of Otago, PO Box 56, Dunedin 9054, New  
9 Zealand

10 <sup>3</sup>Department of Limnology and Oceanography, Division of Bio-Oceanography, University of  
11 Vienna, Althanstrasse 14, A-1090 Vienna, Austria

12

13 **\*Correspondance:**

14 Dr. Sergio E. Morales, University of Otago, Department of Microbiology and Immunology,  
15 720 Cumberland Street, North Dunedin, Dunedin 9054, New Zealand

16 Email: sergio.morales@otago.ac.nz, Phone: + 64 3 479 3140

17

18 Dr. Federico Baltar, Department of Limnology and Oceanography, Division of Bio-  
19 Oceanography, University of Vienna, Althanstrasse 14, A-1090 Vienna, Austria

20 Email: federico.baltar@univie.ac.at, Phone: +43-(0)1-4277-76436

21

22 **Running title:** Metabolic profiling of NZ fjords

23 **Keywords:** *Fjord; 16S; 18S; microbial community; Fiordland; metabolic diversity*

24

Tobias-Hünefeldt et al. Metabolic profiling of NZ fjords

25 **Abstract**

26 Fjords are semi-enclosed marine systems with unique physical conditions that influence  
27 microbial communities structure. Pronounced organic matter and physical condition gradients  
28 within fjords provide a natural laboratory for the study of changes in microbial phylogeny  
29 and metabolic potential in response to environmental conditions (e.g. depth). In the open  
30 ocean new production from photosynthesis supplies organic matter to deeper aphotic layers,  
31 sustaining microbial activity. We measured the metabolic diversity and activity of microbial  
32 communities in fjords to determine patterns in metabolic potential across and within fjords,  
33 and whether these patterns could be explained by community composition modifications. We  
34 demonstrated that metabolic potential and activity are shaped by similar parameters as total  
35 (prokaryotic and eukaryotic) microbial communities. However, we identified increases in  
36 metabolic diversity and potential (but not in community composition) at near bottom  
37 (aphotic) sites consistent with the influence of sediments in deeper waters. Thus, while  
38 composition and function of the microbial community in the upper water column was likely  
39 shaped by marine snow and sinking POM generated by new production, deeper sites were  
40 strongly influenced by sediment resuspension of benthic organic matter generated from this  
41 or other sources (terrestrial, chemoautotrophic, microbial carbon loop), uncoupling the  
42 community composition and function dynamics.

43

44

Tobias-Hünefeldt et al. Metabolic profiling of NZ fjords

45 **Introduction**

46 Fjords are unique environments, representing modified marine ecosystems mixing  
47 freshwater, terrestrial and marine inputs. As such, influences on structure and function of  
48 microbial communities are linked to changes in environmental conditions associated with  
49 each input, including alternate organic carbon sources (e.g. tannins, terrestrial, marine and  
50 freshwater sources), as well as modified salinity, nutrient, and light environments (Mckee et  
51 al., 2002; Pulchan et al., 2003; Cui et al., 2016). Moreover, due to these strong environmental  
52 gradients, fjords are ideal natural laboratories to study marine microbial communities and the  
53 controls of their phylogenetic and functional diversity. However, the energy sources  
54 supporting primary production and heterotrophic activity in fjords, and how they change in  
55 correlation to observed community changes, remain poorly defined. In open ocean systems  
56 primary productivity by surface phytoplankton mediates the downward flux of particulate  
57 carbon, transferring energy to aphotic zones. This unidirectional transfer of carbon through  
58 microbial/biological biomass from surface waters to deeper layers is termed the biological  
59 carbon pump (Jiao et al., 2010; Jiao and Zheng, 2011; Legendre et al., 2015). This process is  
60 also expected to dominate in fjords where carbon is predominantly linked to phytoplankton  
61 production (Albright et al., 1986; Amy et al., 1987; Alldredge et al., 2002), sustaining a  
62 significant portion of heterotrophic respiration (Iturriaga and Hoppe, 1977). Nevertheless,  
63 fjord benthic community studies have demonstrated that microbial reworking of refractory  
64 organic matter from terrestrial sources is an additional important source of carbon to deep  
65 communities (McLeod and Wing 2007, McLeod and Wing 2009, McLeod Wing and Skilton  
66 2010). Despite this, we lack an integrated view of microbial metabolic potential across fjords  
67 and specific information about microbial populations possibly linked to them, providing a  
68 mechanistic understanding of their selection. This limits our understanding of how this  
69 ecosystem is sustained and shaped.

Tobias-Hünefeldt et al. Metabolic profiling of NZ fjords

70           We previously examined the patterns in microbial community composition relative to  
71    variability in environmental factors among fjords in the New Zealand Fiordland system  
72    (Tobias-Hünefeldt et al., 2019). But links between patterns in phylogenetic and functional  
73    diversity in these fjords remained unaddressed. In the present study we utilised functional  
74    potential profiling (via Biolog Ecoplates), bacterial abundance, heterotrophic production (via  
75    <sup>3</sup>H-leucine incorporation) and prokaryotic/eukaryotic community composition (via 16S and  
76    18S rRNA amplicon sequencing) to compare community metabolic diversity and potential,  
77    and how it related to known drivers of microbial community changes across six different  
78    fjords in New Zealand. We found that community metabolic potential and diversity at surface  
79    sites follow similar patterns to those observed when examining whole community  
80    composition. However, a high resolution analysis along a depth profile of a fjord indicates  
81    two potential drivers of metabolic diversity and potential (i.e. vertical transfer of carbon via  
82    suspended particulate organic matter through the biological carbon pump, and resuspension  
83    of organic matter from sediments linked to the benthic microbial loop and terrestrial carbon  
84    sources).

85

## 86 **Results and Discussion**

87       The present study was carried out in six fjords within New Zealand's Fiordland system,  
88 specifically Breaksea Sound, Chalky Inlet, Doubtful Sound, Dusky Sound, Long Sound, and  
89 Wet Jacket Arm, utilising an identical sampling scheme as described in (Tobias-Hünefeldt et  
90 al., 2019). Analyses were divided into three categories, a multi-fjord analysis comprising five  
91 of the tested fjords (excluding Long Sound), a high resolution study along Long Sound's  
92 horizontal axis, and a depth profile of Long Sound's deepest location. Total community  
93 composition (via 16S and 18S sequencing) and metabolic potential did not significantly  
94 covary across the five studied fjords (Mantel,  $r = <0.01$ ,  $p = 0.47$ ), Long Sound's horizontal  
95 transect (Mantel,  $r < 0.01$ ,  $p = >0.05$ ), or Long Sound's depth profile (Mantel,  $r = <0.22$ ,  $p =$   
96  $>0.05$ ). However, depth covaried with both metabolic potential and community structure  
97 among all fjords, across the horizontal transect at Long Sound, and along Long Sound's  
98 depth profile (Figure 1, Figure S1-S3, Table S1). Significant differences in metabolic  
99 potential with depth were observed both across multiple fjords (Anosim:  $R = 0.10$ ,  $P \text{ value} =$   
100  $0.03$ ) and along a transect from the entrance of the ocean to the head of Long Sound  
101 (Anosim:  $R = 0.27$ ,  $P \text{ value} = <0.01$ ) (Figure 1). Microbial community changes along the  
102 horizontal axis were stronger between surface and 10 m communities (Mantel, Multifjord –  $r$   
103  $= 0.21$ ,  $p = <0.01$ , Transect – prokaryotes  $r = 0.47$ ,  $p = <0.01$ , eukaryotes  $r = 0.56$ ,  $p = <0.01$ ),  
104 as opposed to horizontal location (Mantel, Multifjord –  $r = 0.08$ ,  $p = 0.04$ , Transect –  
105 prokaryotes  $r = 0.21$ ,  $p = 0.01$ , eukaryotes  $r = 0.13$ ,  $p = 0.07$ ) (Figure S2-3).

106       Across the five fjords (excluding Long Sound), surface samples displayed higher  
107 metabolic potential (i.e., average metabolic rate [AMR]) compared to 10 m samples (Wilcox  
108 test,  $W = 425$ ,  $p = <0.01$ ) with samples from the fjord's head having a higher rate in general  
109 (Wilcox test,  $W = 0$ ,  $p = <0.01$ ). Horizontal sampling location affected the observed variance,

Tobias-Hünefeldt et al. Metabolic profiling of NZ fjords

110 with higher variability in metabolic potential observed in samples collected near the fjord  
111 entrance (Figure 1 b, Table S1). While activity was not consistent along the length of the  
112 longest fjord, a sustained elevated activity was seen at surface compared to 10 m depths  
113 (Figure S4). Heterotrophic production (via leucine incorporation) was not significantly  
114 correlated with microbial abundance within the five studied fjords and Long Sounds  
115 horizontal axis (Mantel – Multifjord  $r = 0.04$ ,  $p = 0.22$ , Horizontal  $r = 0.04$ ,  $p = 0.32$ ),  
116 consistent with either differences in grazing pressure between locations or a small proportion  
117 of cells driving a large portion of the productivity. Along the depth profile, prokaryotic  
118 abundance and production were significantly correlated (Mantel,  $r = 0.60$ ,  $p = 0.01$ ); however  
119 clear differences were present, such as a more gradual difference in abundance compared to  
120 the large drop in productivity from the surface to 10 m.

121 To further explore these depth linked changes we focused on a high resolution depth  
122 profile of the deepest fjord. We hypothesized that metabolic rate and diversity would be  
123 driven by marine snow linked to photosynthetic primary producers at the surface (e.g.  
124 phytoplankton and macroalgae) (Figure 2a) leading to a steady decrease in metabolic  
125 potential as resources were depleted with increases in depth. Any deviation altering the slow  
126 loss of metabolic potential would be linked to extraneous sources of nutrients uncoupled from  
127 surface activity. We observed a steady loss of metabolic diversity, and rate, from surface to  
128 100 meters (Figure 2 b, c), with a sustained increase past this point. The observed pattern was  
129 consistent with measurements for bacterial production, but not abundance, that decreased  
130 continuously until reaching equilibrium from 200 m onwards (Figure 2 d). These changes  
131 were associated with shifts in specific carbon utilization potential, where carbohydrate  
132 metabolism decreased from 12.7% to 6.8%, as carboxylic acid utilization increased from  
133 12.0% to 29.5% (Figure 2 e). This likely reflected the diminishing abundance of readily  
134 mineralizable substrates with depth, and the increase in recalcitrant sources of carbon and

Tobias-Hünefeldt et al. Metabolic profiling of NZ fjords

135 energy. Consistently, we also observed increases in phosphorylated chemical metabolism  
136 peaking at 40 and 360 m (Figure 2e) as expected from utilization of phosphorous at the  
137 surface during blooms (Tiselius and Kuylenstierna, 1996). However, observed changes in  
138 metabolic potential did not reflect changes in prokaryotic or eukaryotic community  
139 composition, suggesting that while the community members were relatively consistent past a  
140 certain depth (10 m for eukaryotes and 40 m for prokaryotes) functional potential changed  
141 dynamically past 100 m, regaining metabolic potential with proximity to the bottom (Figure 2  
142 f) to a point closely resembling the metabolically active surface.

143 Our results demonstrate that while metabolic potential and activity in fjords is linked to  
144 similar parameters as microbial community composition across surface or near surface sites,  
145 distinct selective pressures exists at aphotic sites, ultimately affecting the link between  
146 phylogenetic and metabolic diversity. The observed pattern is contrary to our initial  
147 hypothesis and demonstrates that additional refractory sources of organic matter including  
148 resuspension of terrestrial organic matter associated with benthic communities are important  
149 contributors to microbial activity in fjords. We propose that this reflects the influence of the  
150 benthic microbial loop and incorporation and breakdown of terrestrial organic matter in  
151 fjordic sediments. Sediment resuspension through either wave or wind action (Pickrill, 1987;  
152 Christiansen et al., 1992), as well as advection and biological activity provides mechanisms  
153 for increased availability to the microbial community in the deep water column. Sediment  
154 resuspension is known to increase metabolic activity of microbes (Flindt and Kamp-Nielsen,  
155 2017) which is likely an important process in this deep water site where loose sediments are  
156 organically rich reflecting suspended particulate matter [large amounts of fibrous woody  
157 material, finer indeterminate organic plankton, faecal pellets with a small terrestrial  
158 influence] (Pickrill, 1987; Pickrill, 1993). The observed pattern suggests that resuspension  
159 could also be driven by bottom feeding organisms that can resuspend sediments, increasing

Tobias-Hünefeldt et al. Metabolic profiling of NZ fjords

160 suspended carbon and its utilization in near bottom sites (Yahel et al., 2008), influencing the  
161 relation between marine diversity and the metabolic potential of marine microbes.

162

163 **Acknowledgements**

164 We thank the officers and crew of *RV Polaris II* and science staff involved. We also thank M.  
165 Meyers, O. Shatova, B. Dagg and J. Wenley for their contribution to data collection. FB was  
166 supported by a Rutherford Discovery Fellowship (Royal Society of New Zealand). Field  
167 sampling was supported by a Royal Society of New Zealand Marsden Grant (UOO1008) to  
168 SW.

169

170 **Conflict of interest**

171 The authors declare no conflict of interest.

172

173 **Data availability**

174 The sequence data from this study have been deposited in NCBI under BioProject  
175 PRJNA540153. All data generated and/or analysed during the study is available within the  
176 GitHub repository, [https://github.com/SvenTobias-Hunefeldt/Fjordland\\_2019b/](https://github.com/SvenTobias-Hunefeldt/Fjordland_2019b/).

177

178 Supplementary information is available at Frontiers in Marine Science Journal's website'.

179



Tobias-Hünefeldt et al. Metabolic profiling of NZ fjords

180 **References**

181

182 Albright, L.J., McCrae, S.K., and May, B.E. (1986) Attached and free-floating  
183 bacterioplankton in howe sound, british columbia, a coastal marine fjord-embayment. *Appl*  
184 *Environ Microbiol* **51**: 614-621.

185 Alldredge, A.L., Cowles, T.J., MacIntyre, S., Rines, J.E.B., Donaghay, P.L., Greenlaw, C.F.  
186 et al. (2002) Occurrence and mechanisms of formation of a dramatic thin layer of marine  
187 snow in a shallow Pacific fjord. *Marine Ecology Progress Series* **233**: 1-12.

188 Altschul, S.F., Madden, T.L., Schaffer, A.A., Zhang, J., Zhang, Z., Miller, W., and Lipman,  
189 D.J. (1997) Gapped BLAST and PSI-BLAST: a new generation of protein database search  
190 programs. *Nucleic Acids Res.* **25**: 3389–3402.

191 Amy, P.S., Caldwell, B.A., Soeldner, A.H., Morita, R.Y., and Albright, L.J. (1987) Microbial  
192 Activity and Ultrastructure of Mineral-Based Marine Snow from Howe Sound, British-  
193 Columbia. *Canadian Journal of Fisheries and Aquatic Sciences* **44**: 1135-1142.

194 Caporaso, J.G., Kuczynski, J., Stombaugh, J., Bittinger, K., Bushman, F.D., Costello, E.K., et  
195 al. (2010) correspondence QIIME allows analysis of high- throughput community sequencing  
196 data Intensity normalization improves color calling in SOLiD sequencing. *Nat Publ Gr* **7**:  
197 335–336.

198 Christiansen, C., Zacharias, I., and Vang, T. (1992) Storage, Redistribution and Net Export of  
199 Dissolved and Sediment-Bound Nutrients, Vejle Fjord, Denmark. *Hydrobiologia* **235**: 47-57.

Tobias-Hünefeldt et al. Metabolic profiling of NZ fjords

- 200 Cui, X., Bianchi, T.S., Savage, C., and Smith, R.W. (2016) Organic carbon burial in fjords:  
201 Terrestrial versus marine inputs. *Earth and Planetary Science Letters* **451**: 41-50.
- 202 Edgar, R.C. (2010) Search and clustering orders of magnitude faster than BLAST.  
203 *Bioinformatics* **26**: 2460–2461.
- 204 Fischer H, P.M. (1999) Use of the [(14)C]leucine incorporation technique to measure  
205 bacterial production in river sediments and the epiphyton. *Appl Environ Microbiol* **65**: 4411–  
206 4418.
- 207 Flindt, M.R., and Kamp-Nielsen, L. (2017) The influence of sediment resuspension on  
208 nutrient metabolism in the eutrophic Roskilde Fjord, Denmark. *SIL Proceedings, 1922-2010*  
209 **26**: 1457-1461.
- 210 Iturriaga, R., and Hoppe, H.G. (1977) Observations of heterotrophic activity on  
211 photoassimilated organic matter. *Marine Biology* **40**: 101-108.
- 212 Jiao, N., and Zheng, Q. (2011) The microbial carbon pump: from genes to ecosystems. *Appl*  
213 *Environ Microbiol* **77**: 7439-7444.
- 214 Jiao, N., Herndl, G.J., Hansell, D.A., Benner, R., Kattner, G., Wilhelm, S.W. et al. (2010)  
215 Microbial production of recalcitrant dissolved organic matter: long-term carbon storage in the  
216 global ocean. *Nat Rev Microbiol* **8**: 593-599.

Tobias-Hünefeldt et al. Metabolic profiling of NZ fjords

- 217 Legendre, L., Rivkin, R.B., Weinbauer, M.G., Guidi, L., and Uitz, J. (2015) The microbial  
218 carbon pump concept: Potential biogeochemical significance in the globally changing ocean.  
219 *Progress in Oceanography* **134**: 432-450.
- 220 Mckee, D., Cunningham, A., and Jones, K.J. (2002) Optical and hydrographic consequences  
221 of freshwater run-off during spring phytoplankton growth in a Scottish fjord. *Journal of*  
222 *Plankton Research* **24**: 1163-1171.
- 223 Pickrill, R.A. (1987) Circulation and Sedimentation of Suspended Particulate Matter in New-  
224 Zealand Fjords. *Marine Geology* **74**: 21-39.
- 225 Pickrill, R.A. (1993) SEDIMENT YIELDS IN FIORDLAND. *Journal of Hydrology (New*  
226 *Zealand)* **31**: 39-55.
- 227 Pulchan, K.J., Helleur, R., and Abrajano, T.A. (2003) TMAH thermochemolysis  
228 characterization of marine sedimentary organic matter in a Newfoundland fjord. *Organic*  
229 *Geochemistry* **34**: 305-317.
- 230 Quast, C., Pruesse, E., Yilmaz, P., Gerken, J., Schweer, T., Yarza, P., et al. (2013) The  
231 SILVA ribosomal RNA gene database project: Improved data processing and web-based  
232 tools. *Nucleic Acids Res.* **41**: 590–596.
- 233
- 234 Thompson, L.R., Sanders, J.G., McDonald, D., Amir, A., Ladau, J., Locey, K.J., et al. (2017)  
235 A communal catalogue reveals Earth’s multiscale microbial diversity. *Nature* **551**: 457–463.  
236

Tobias-Hünefeldt et al. Metabolic profiling of NZ fjords

- 237 Tiselius, P., and Kuylenstierna, M. (1996) Growth and decline of a diatom spring bloom:  
238 Phytoplankton species composition, formation of marine snow and the role of heterotrophic  
239 dinoflagellates. *Journal of Plankton Research* **18**: 133-155.
- 240 Tobias-Hünefeldt, S. P., Wing, S. R., Espinel-Velasco, N., Baltar, F., & Morales, S. E.  
241 (2019). Depth and location influence prokaryotic and eukaryotic microbial community  
242 structure in New Zealand fjords. *Science of the Total Environment*. 693, 133507
- 243 Yahel, G., Yahel, R., Katz, T., Lazar, B., Herut, B., and Tunnicliffe, V. (2008) Fish activity: a  
244 major mechanism for sediment resuspension and organic matter remineralization in coastal  
245 marine sediments. *Marine Ecology Progress Series* **372**: 195-209.
- 246
- 247

Tobias-Hünefeldt et al. Metabolic profiling of NZ fjords

248 **Figure 1. Biolog Ecoplate derived surface vs. 10 m PCA.** Depth separated samples for  
249 Multifjord data (a) Long Sound's horizontal transect (b) calculated into a PCA plot. Text  
250 labels representing the horizontal location; either near the head/mouth of the fjord (a), or  
251 being defined by the Km from the outermost sample (b). Ellipses represent the 95%  
252 confidence interval. 150  $\mu$ L of sample were utilised per Biolog Ecoplate well, and then  
253 incubated for 7 days at 4°C. Colour patterns assessed at OD A590 nm.

254 **Figure 2. Benthic and surface influence on metabolic potential.** A model of purely surface  
255 vs. surface and benthic influences is shown (a), the Biolog Ecoplate plate derived Average  
256 Metabolic Rate (AMR, b), Community Metabolic Diversity (c), and relative metabolic  
257 potential (e). Bacterial abundance and productivity (c), and taxonomic and Biolog plate  
258 derived dissimilarity from the surface (f). Different carbon source groups were displayed in  
259 various colours (carbohydrates are blue, carboxylic acids are orange, amino acids are light  
260 blue, polymers are green, phosphorylated chemicals are yellow, amines are dark blue), as  
261 well as the Bray-Curtis dissimilarity measures (16S community being black, 18S community  
262 being orange, and Biolog derived metabolic potential being light blue). Communities were  
263 sequenced using the Earth Microbiome protocol (Thompson et al., 2017), OTUs were  
264 generated using QIIME (Caporaso et al., 2012), UCLUST (Edgar, 2010) and SILVA (Quast  
265 et al 2013).

266 **Figure S1. Microbial beta-diversity of five fjords.** The fjord of origin, sample region, and  
267 depth were used to identify sample origin. Dissimilarity was assessed using Bray-Curtis  
268 distance matrices based on OTUs at 97% similarity.

269 **Figure S2. Prokaryotic beta-diversity across Long Sound.** Beta-diversity based on 16S data  
270 for Long Sound's horizontal axis. Dissimilarity was assessed using Bray-Curtis distance  
271 matrices based on OTUs at 97% similarity.

Tobias-Hünefeldt et al. Metabolic profiling of NZ fjords

272

273 **Figure S3. Eukaryotic beta-diversity across Long Sound.** Beta-diversity based 18S data for  
274 Long Sound's horizontal axis. Dissimilarity was assessed using Bray-Curtis distance matrices  
275 based on OTUs at 97% similarity.

276

277 **Figure S4. Average Metabolic rate across Long Sound.** The average metabolic rate  
278 (AMR) across Long Sound's horizontal axis, colour separating depth (red being surface and  
279 blue 10 m).



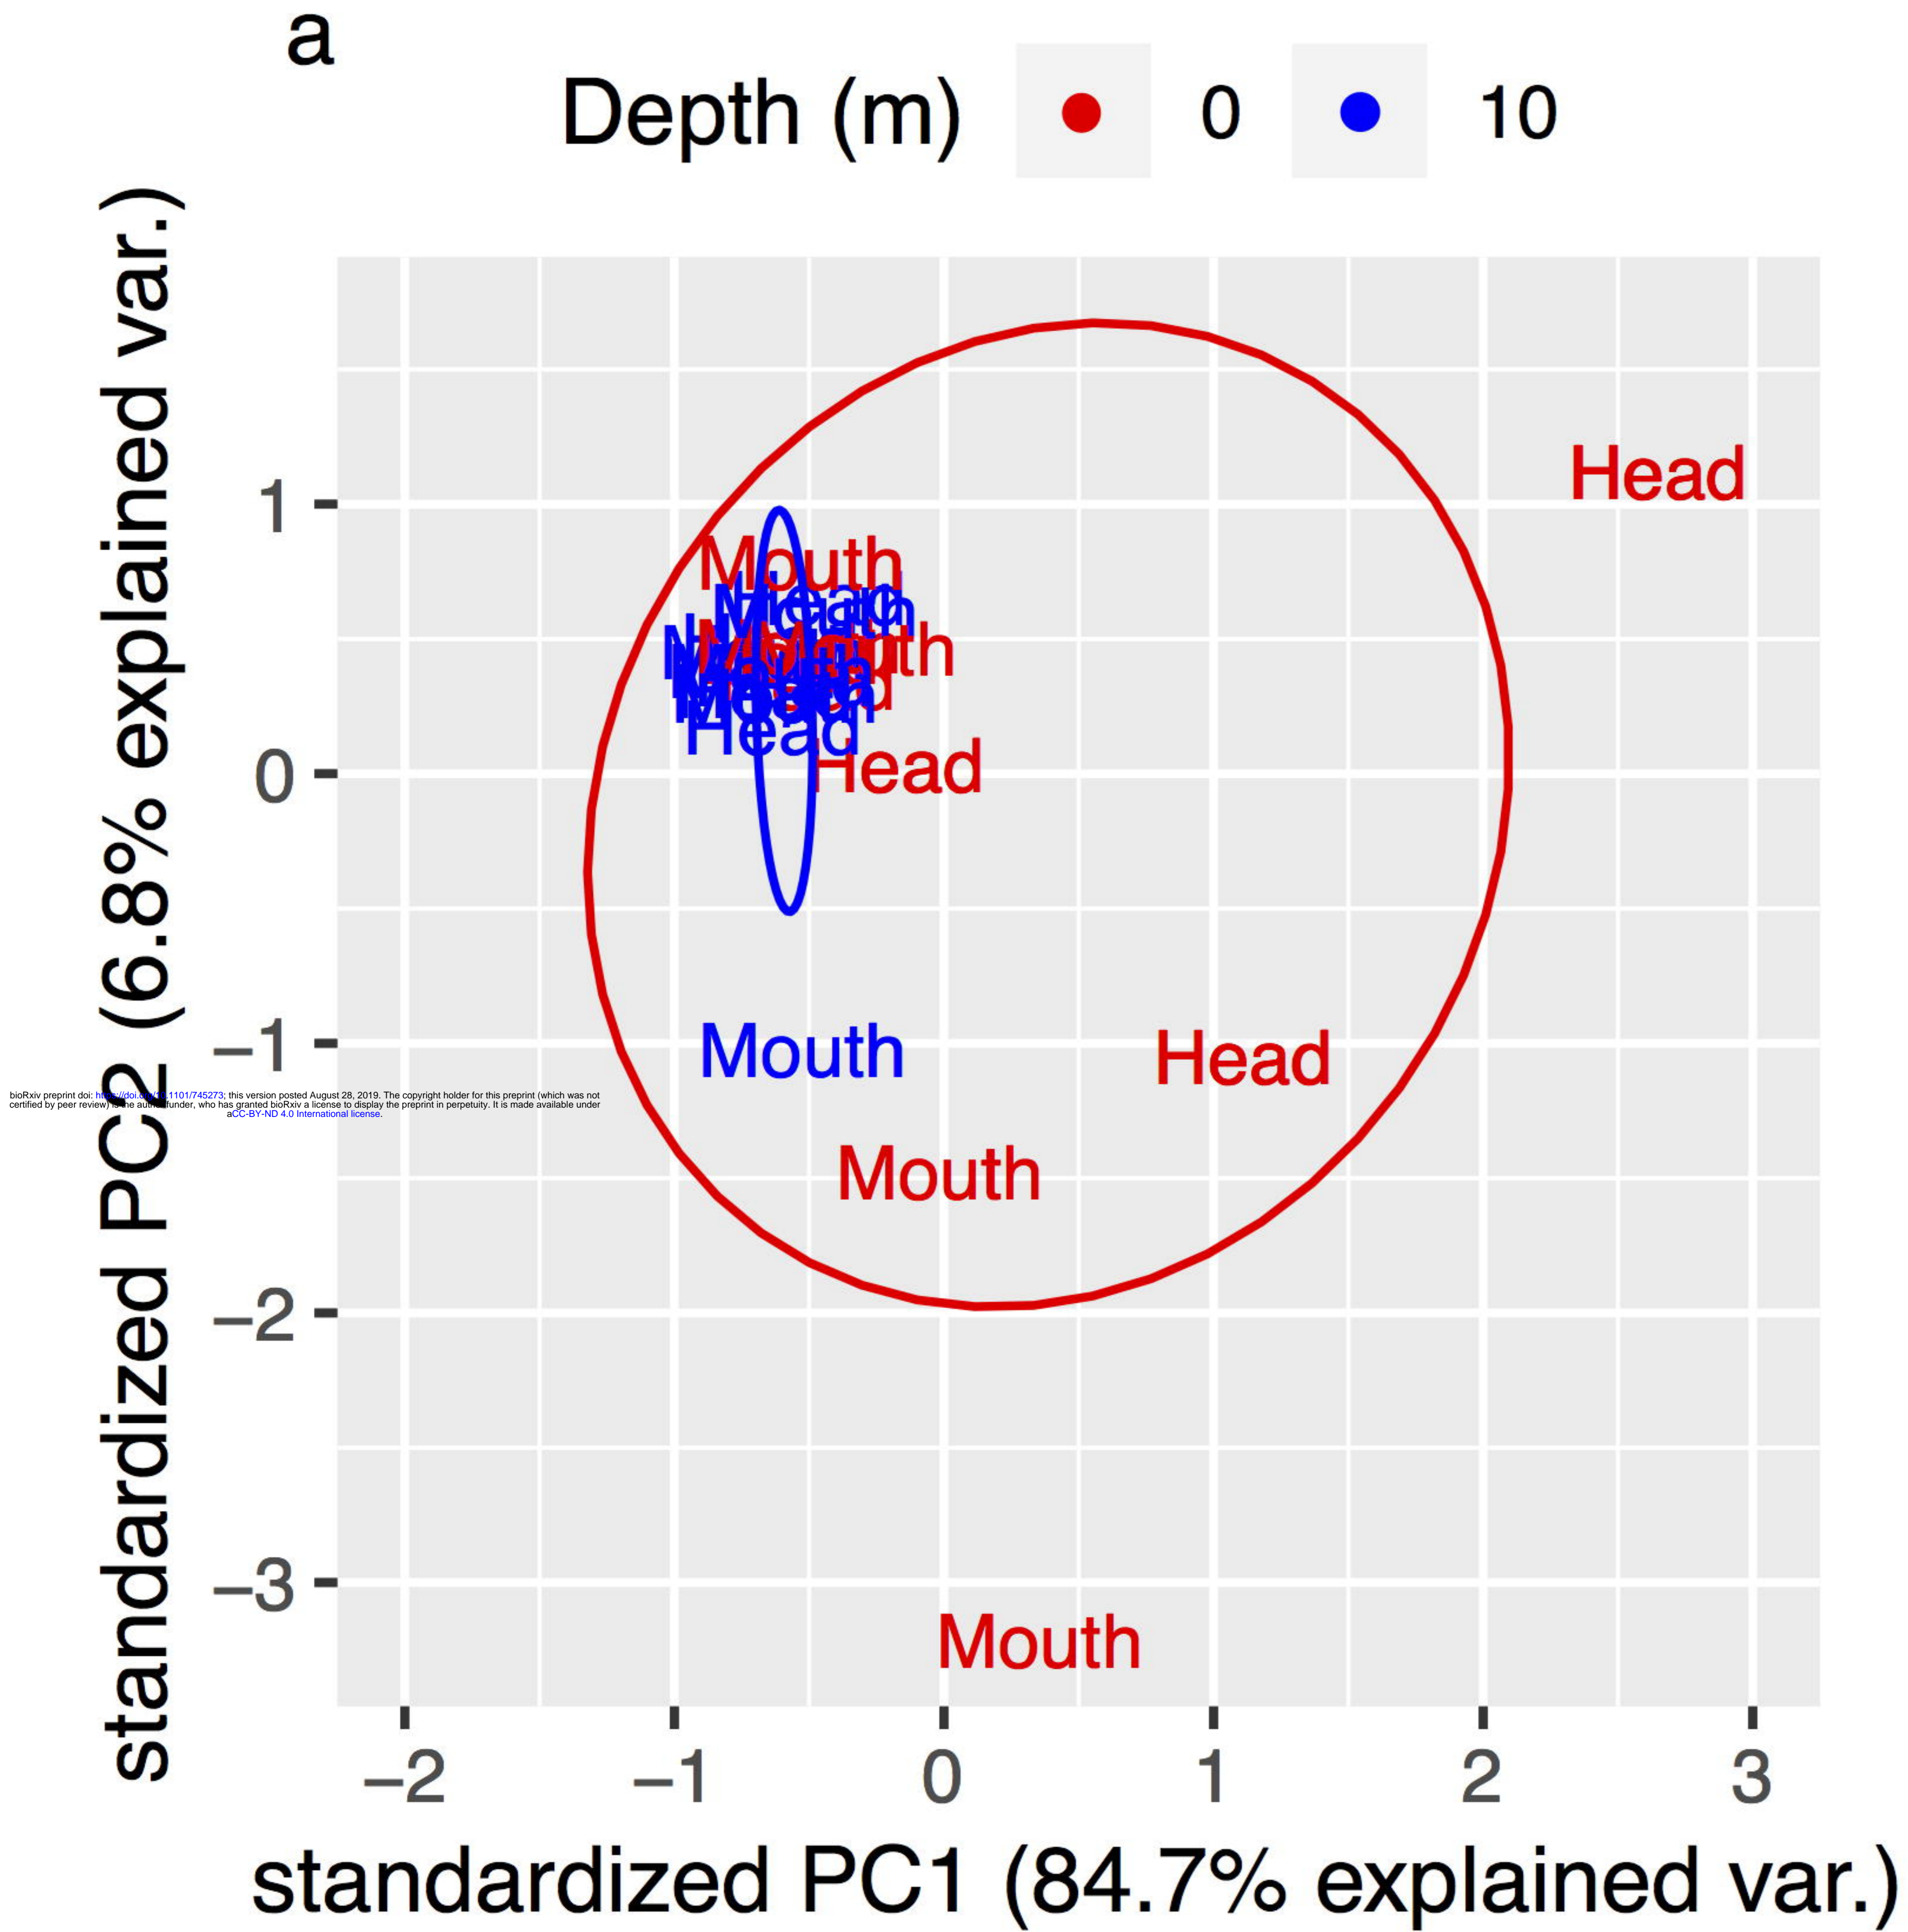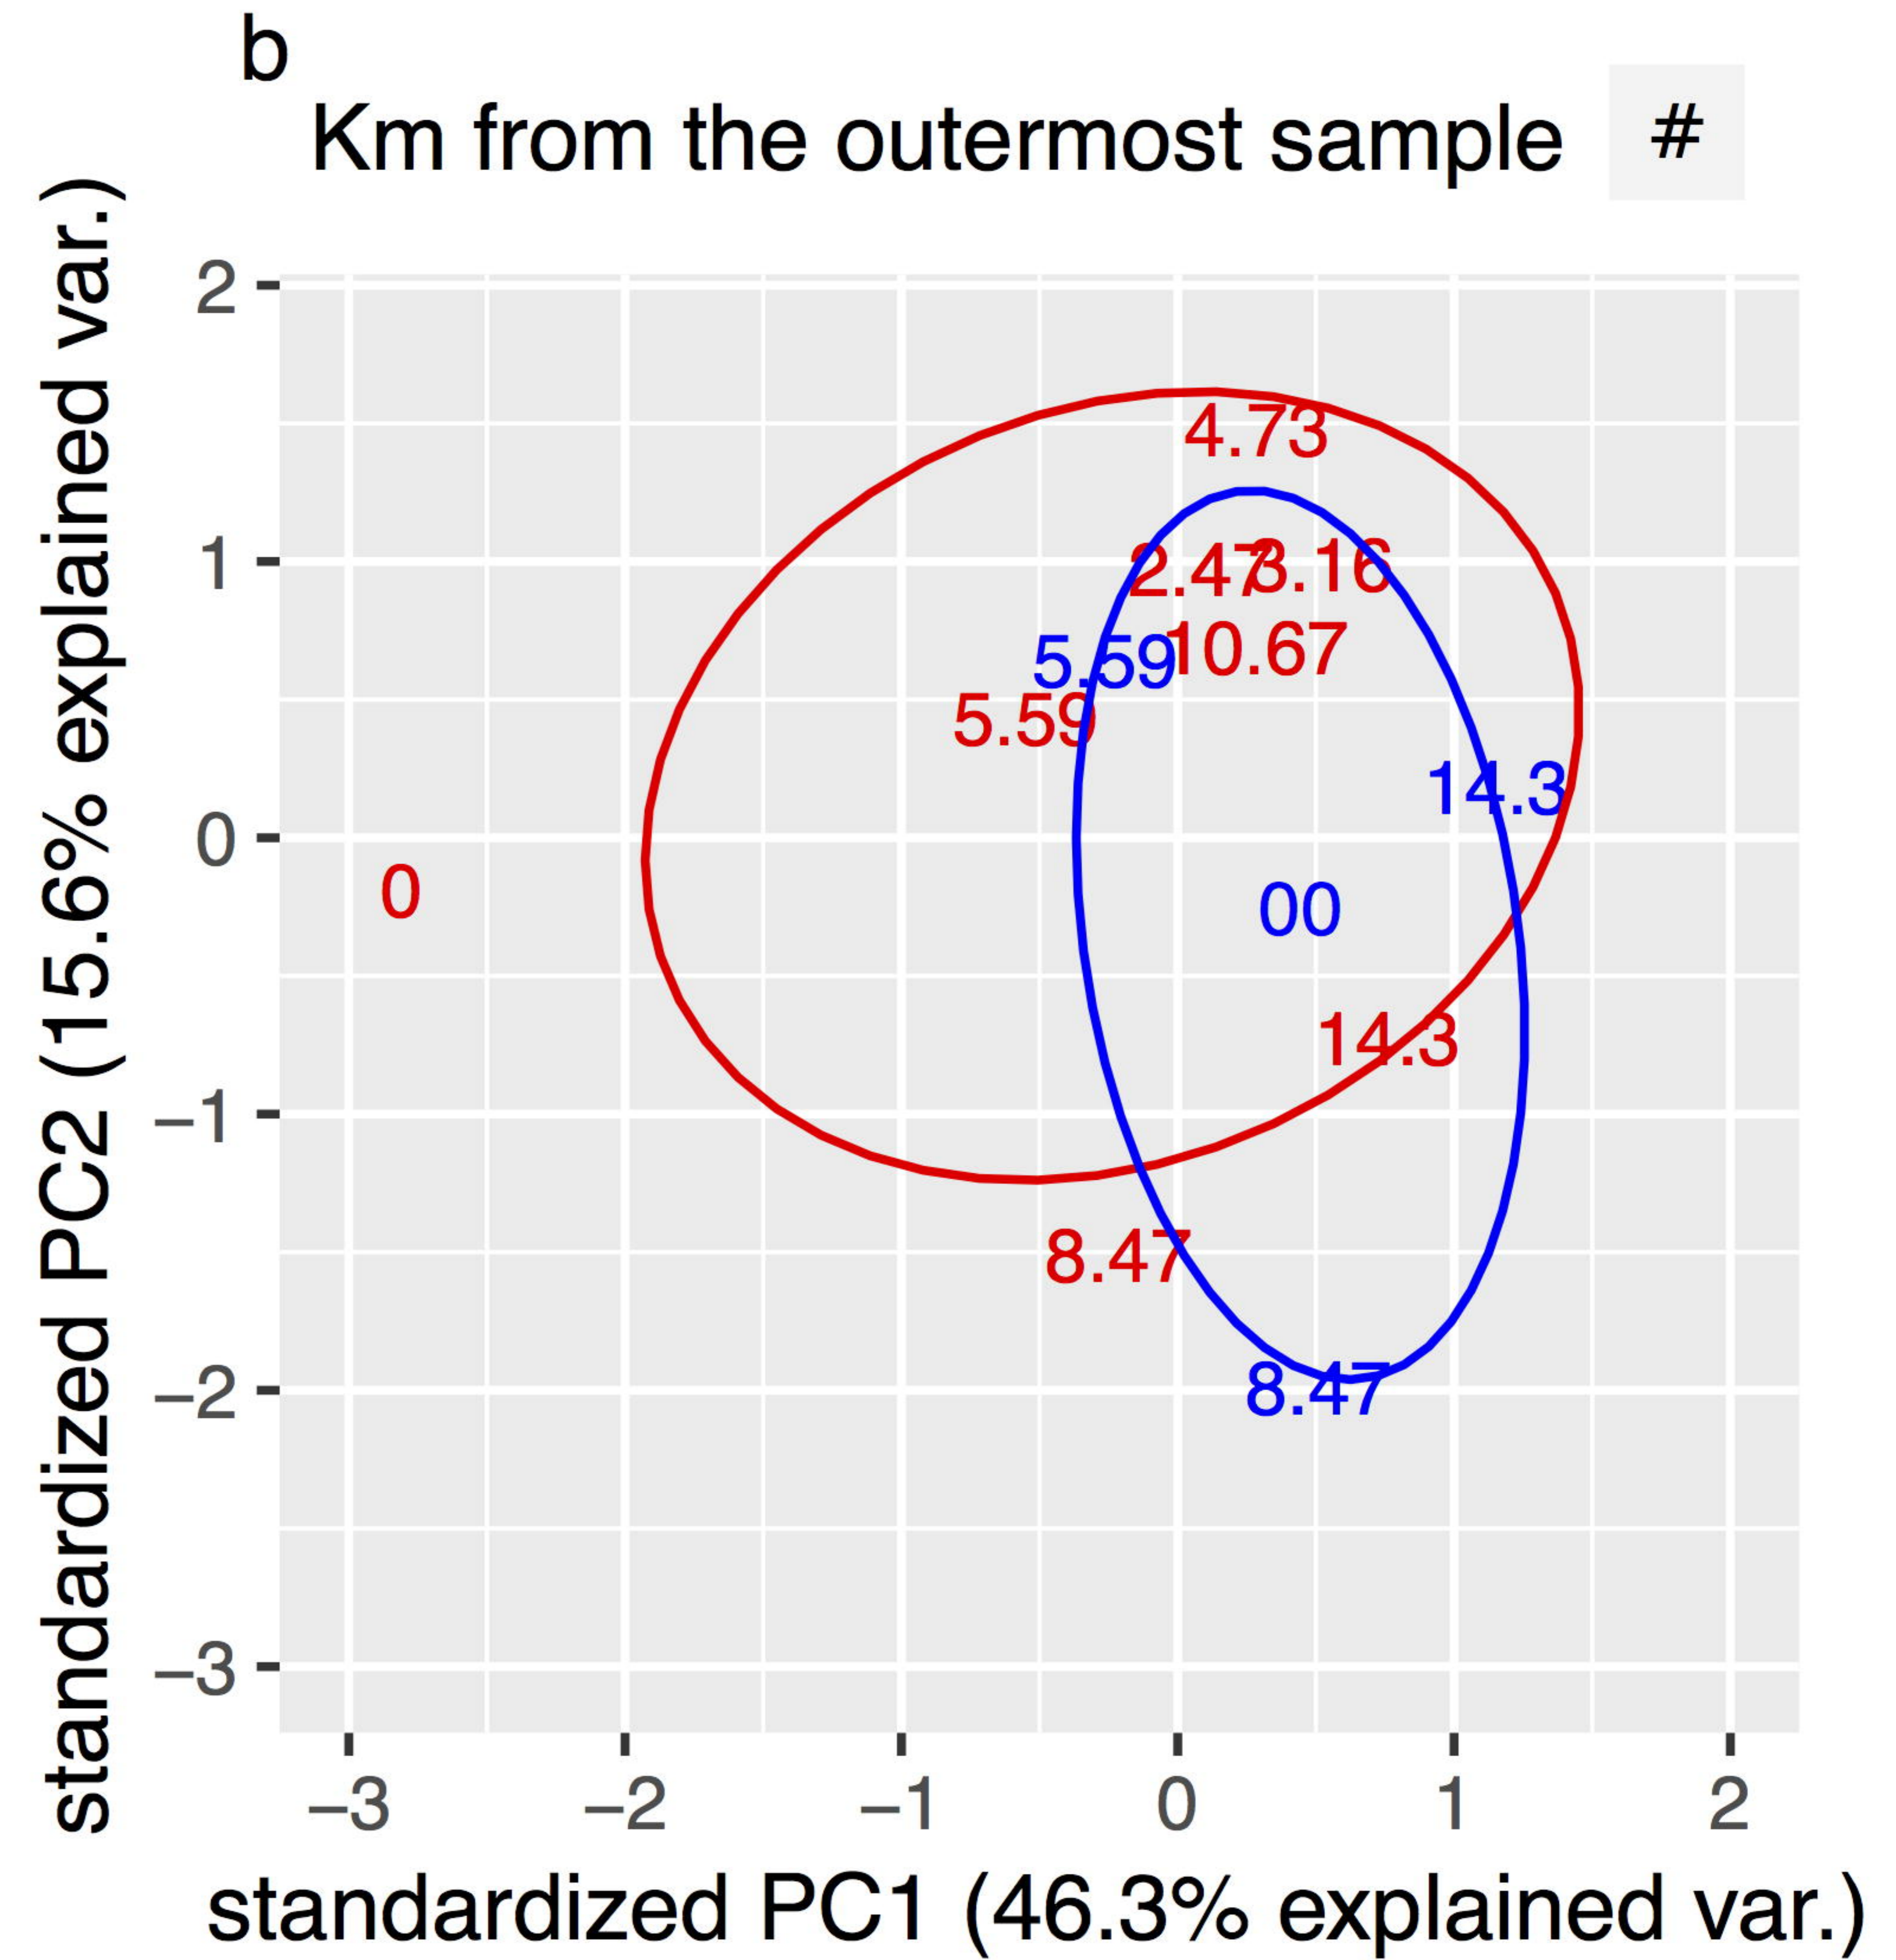



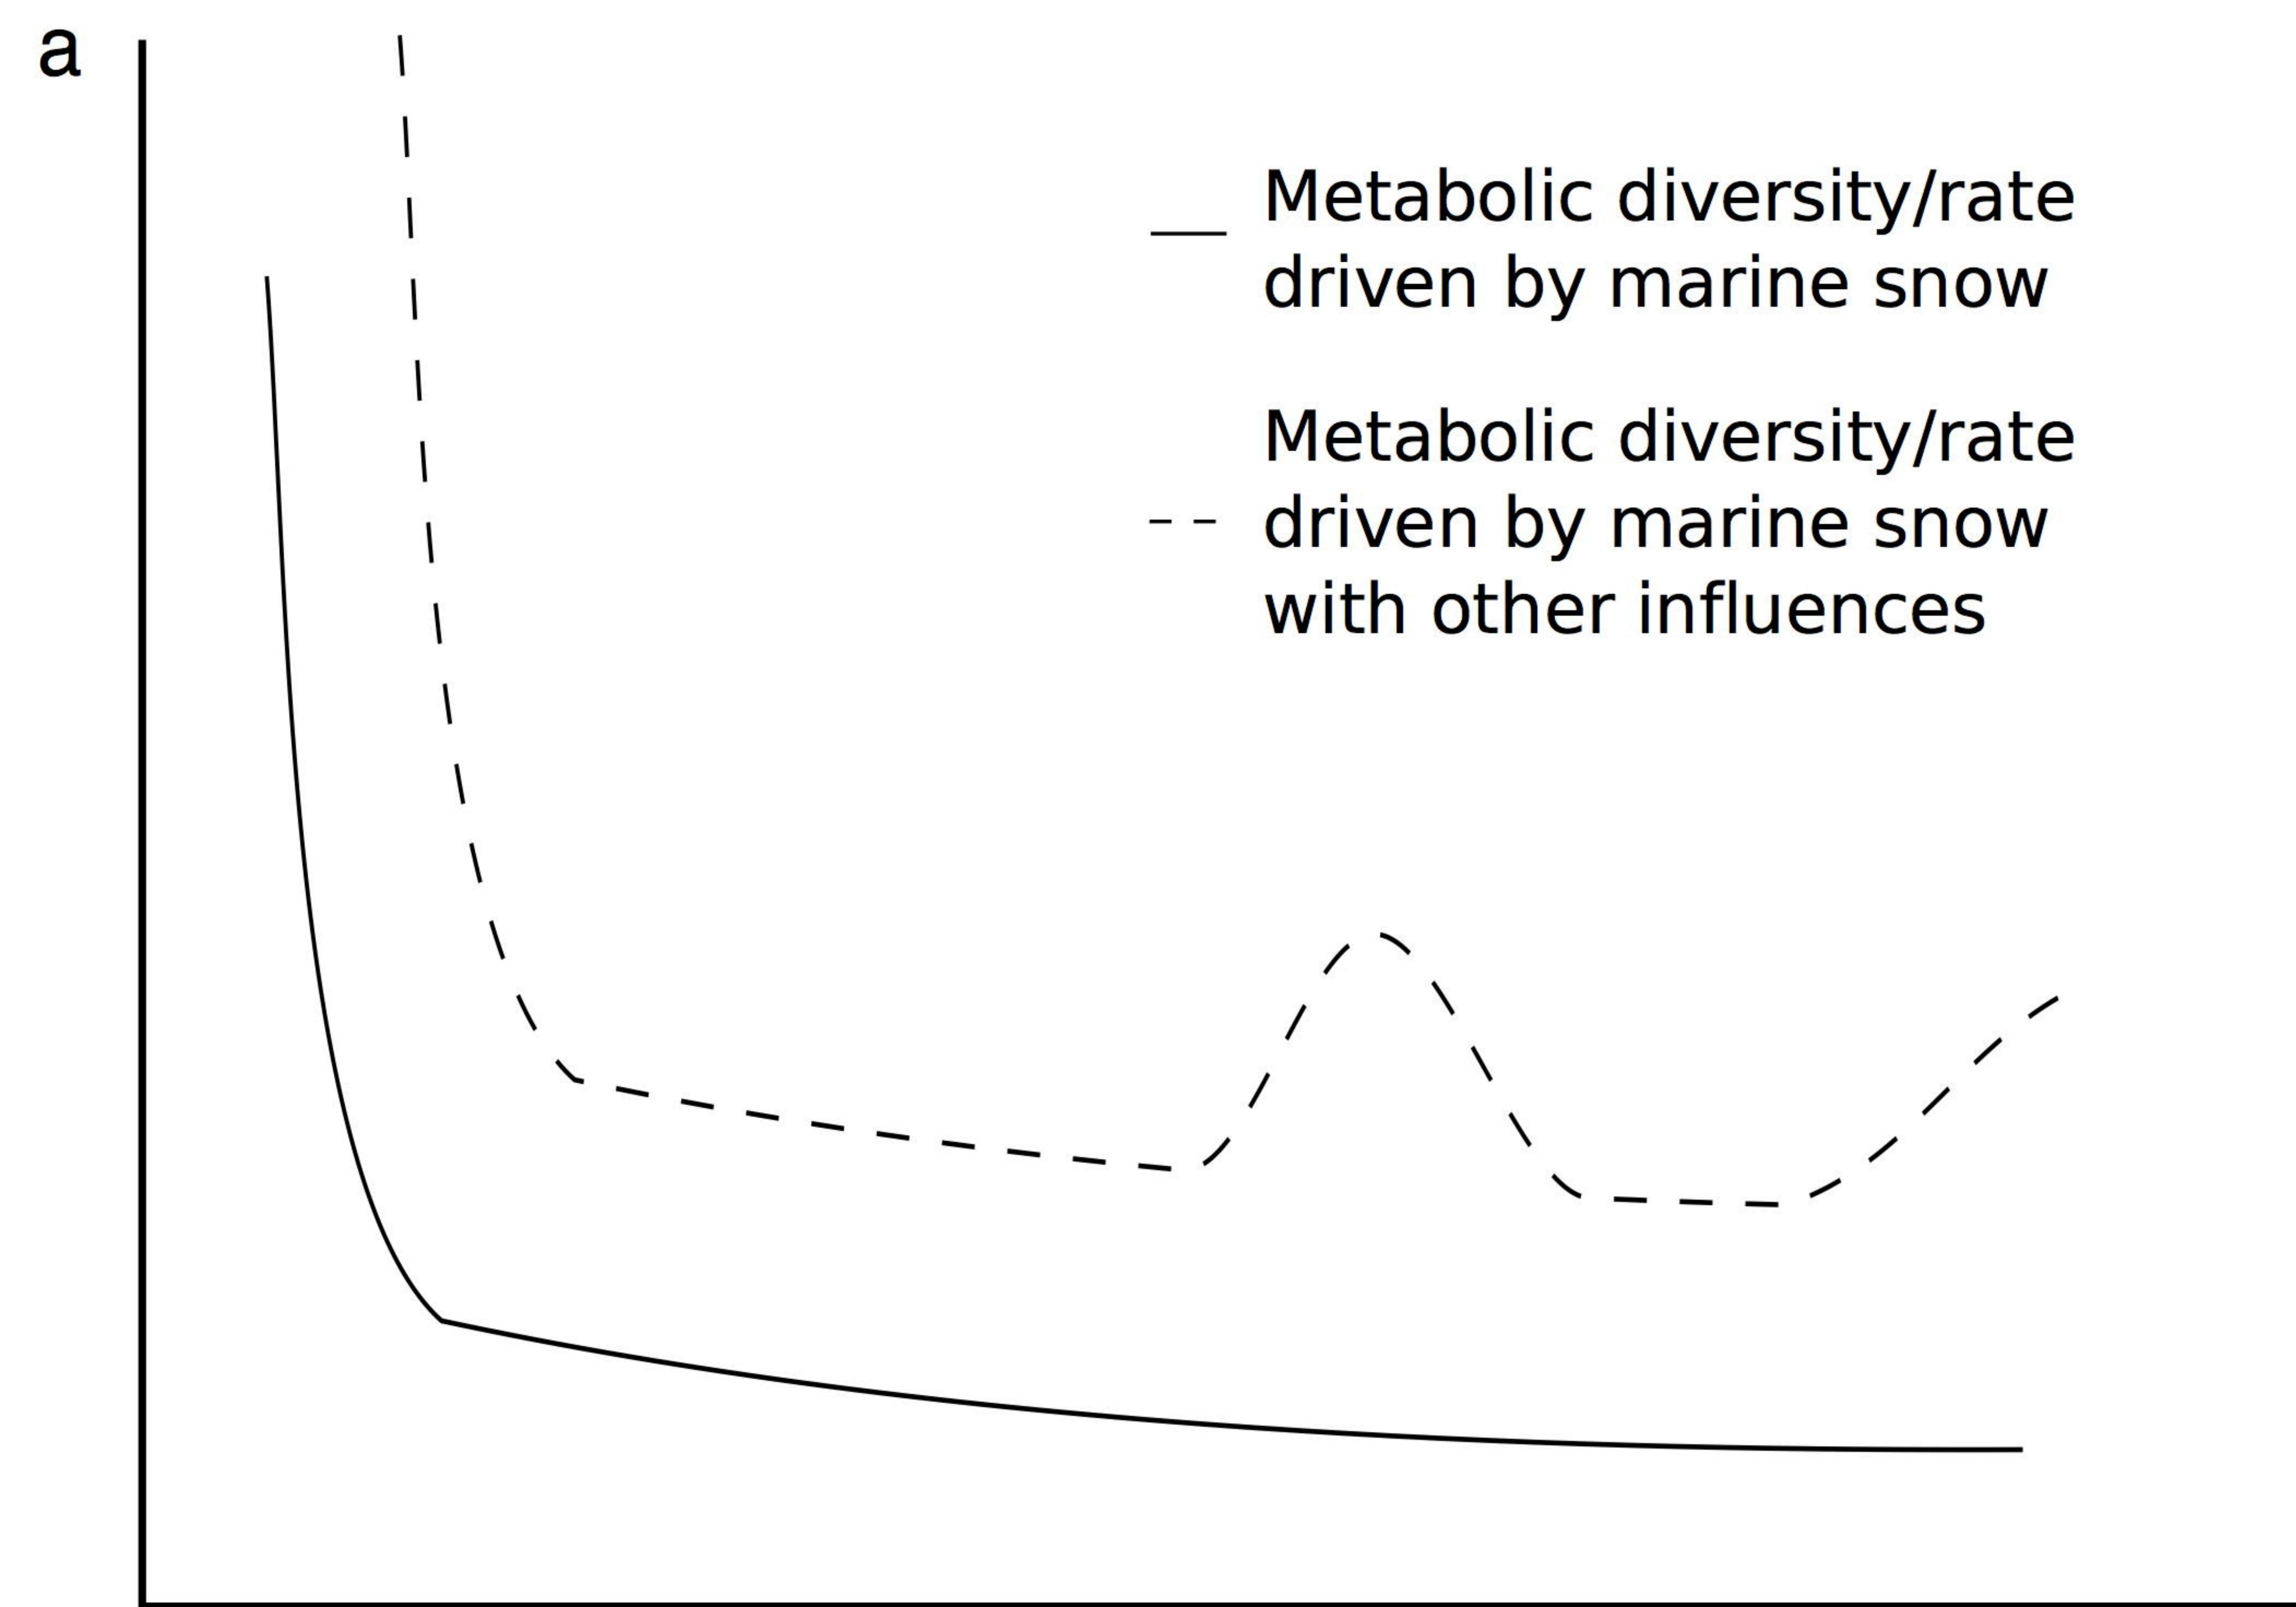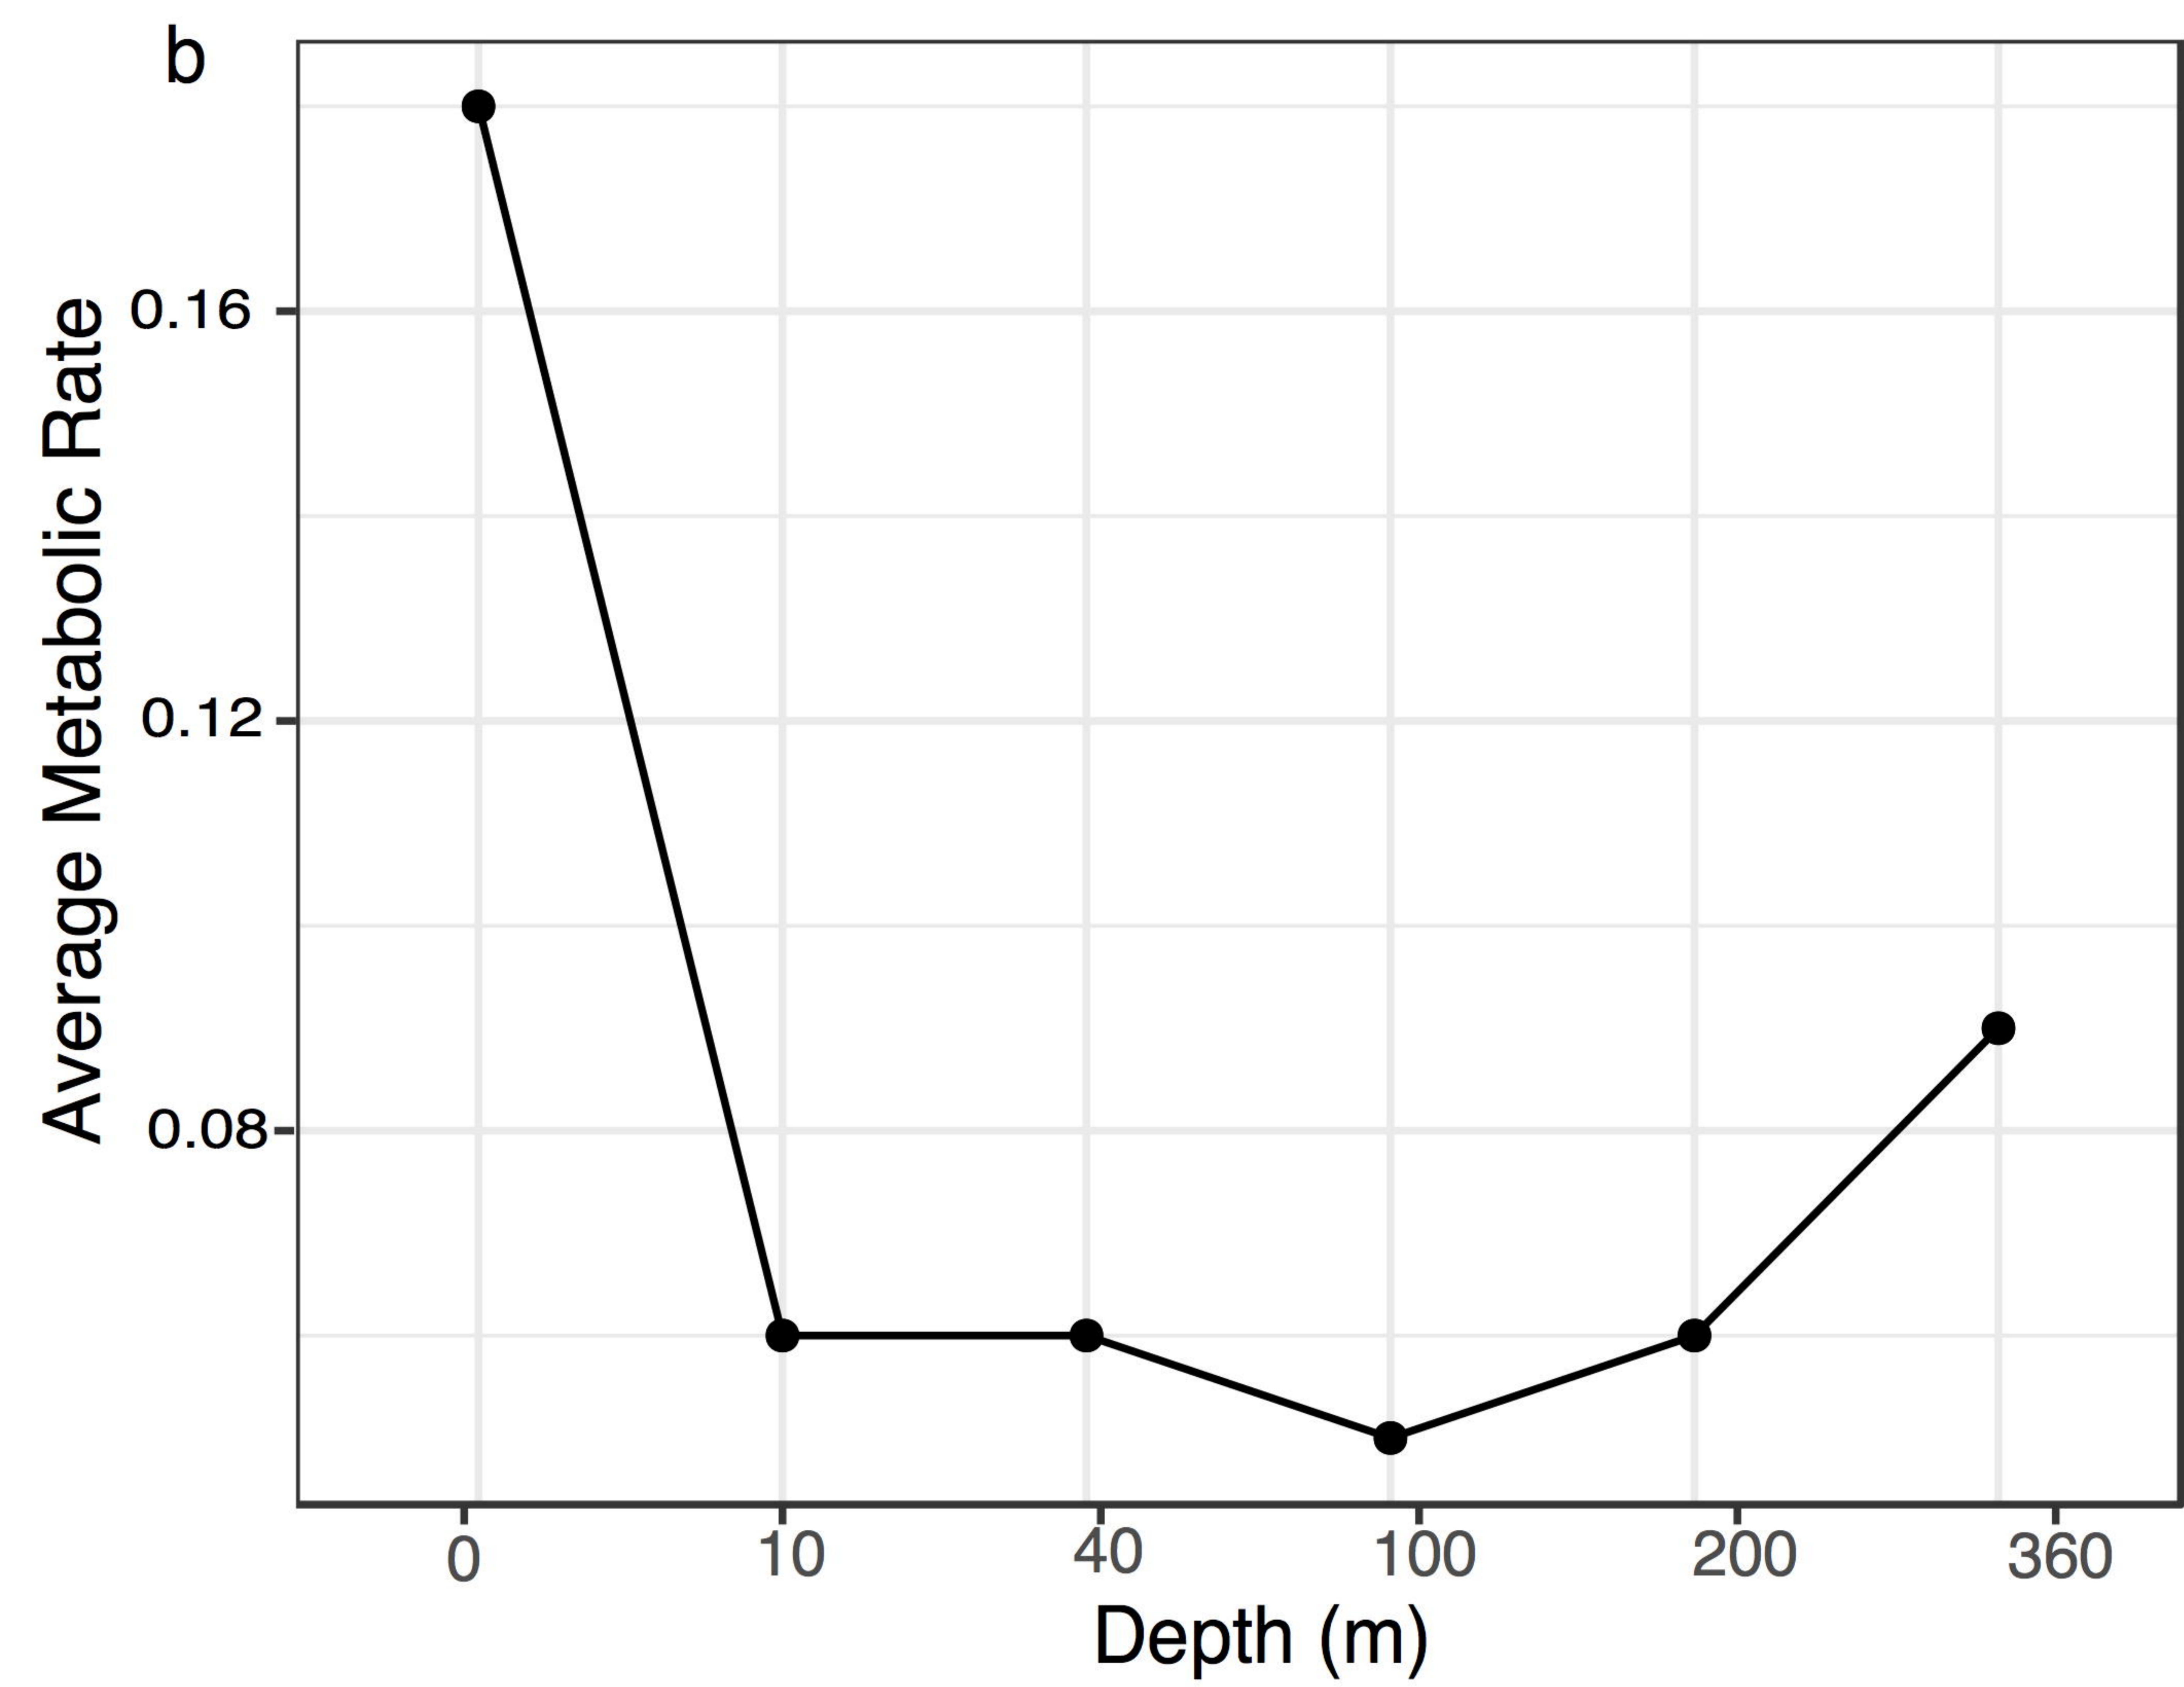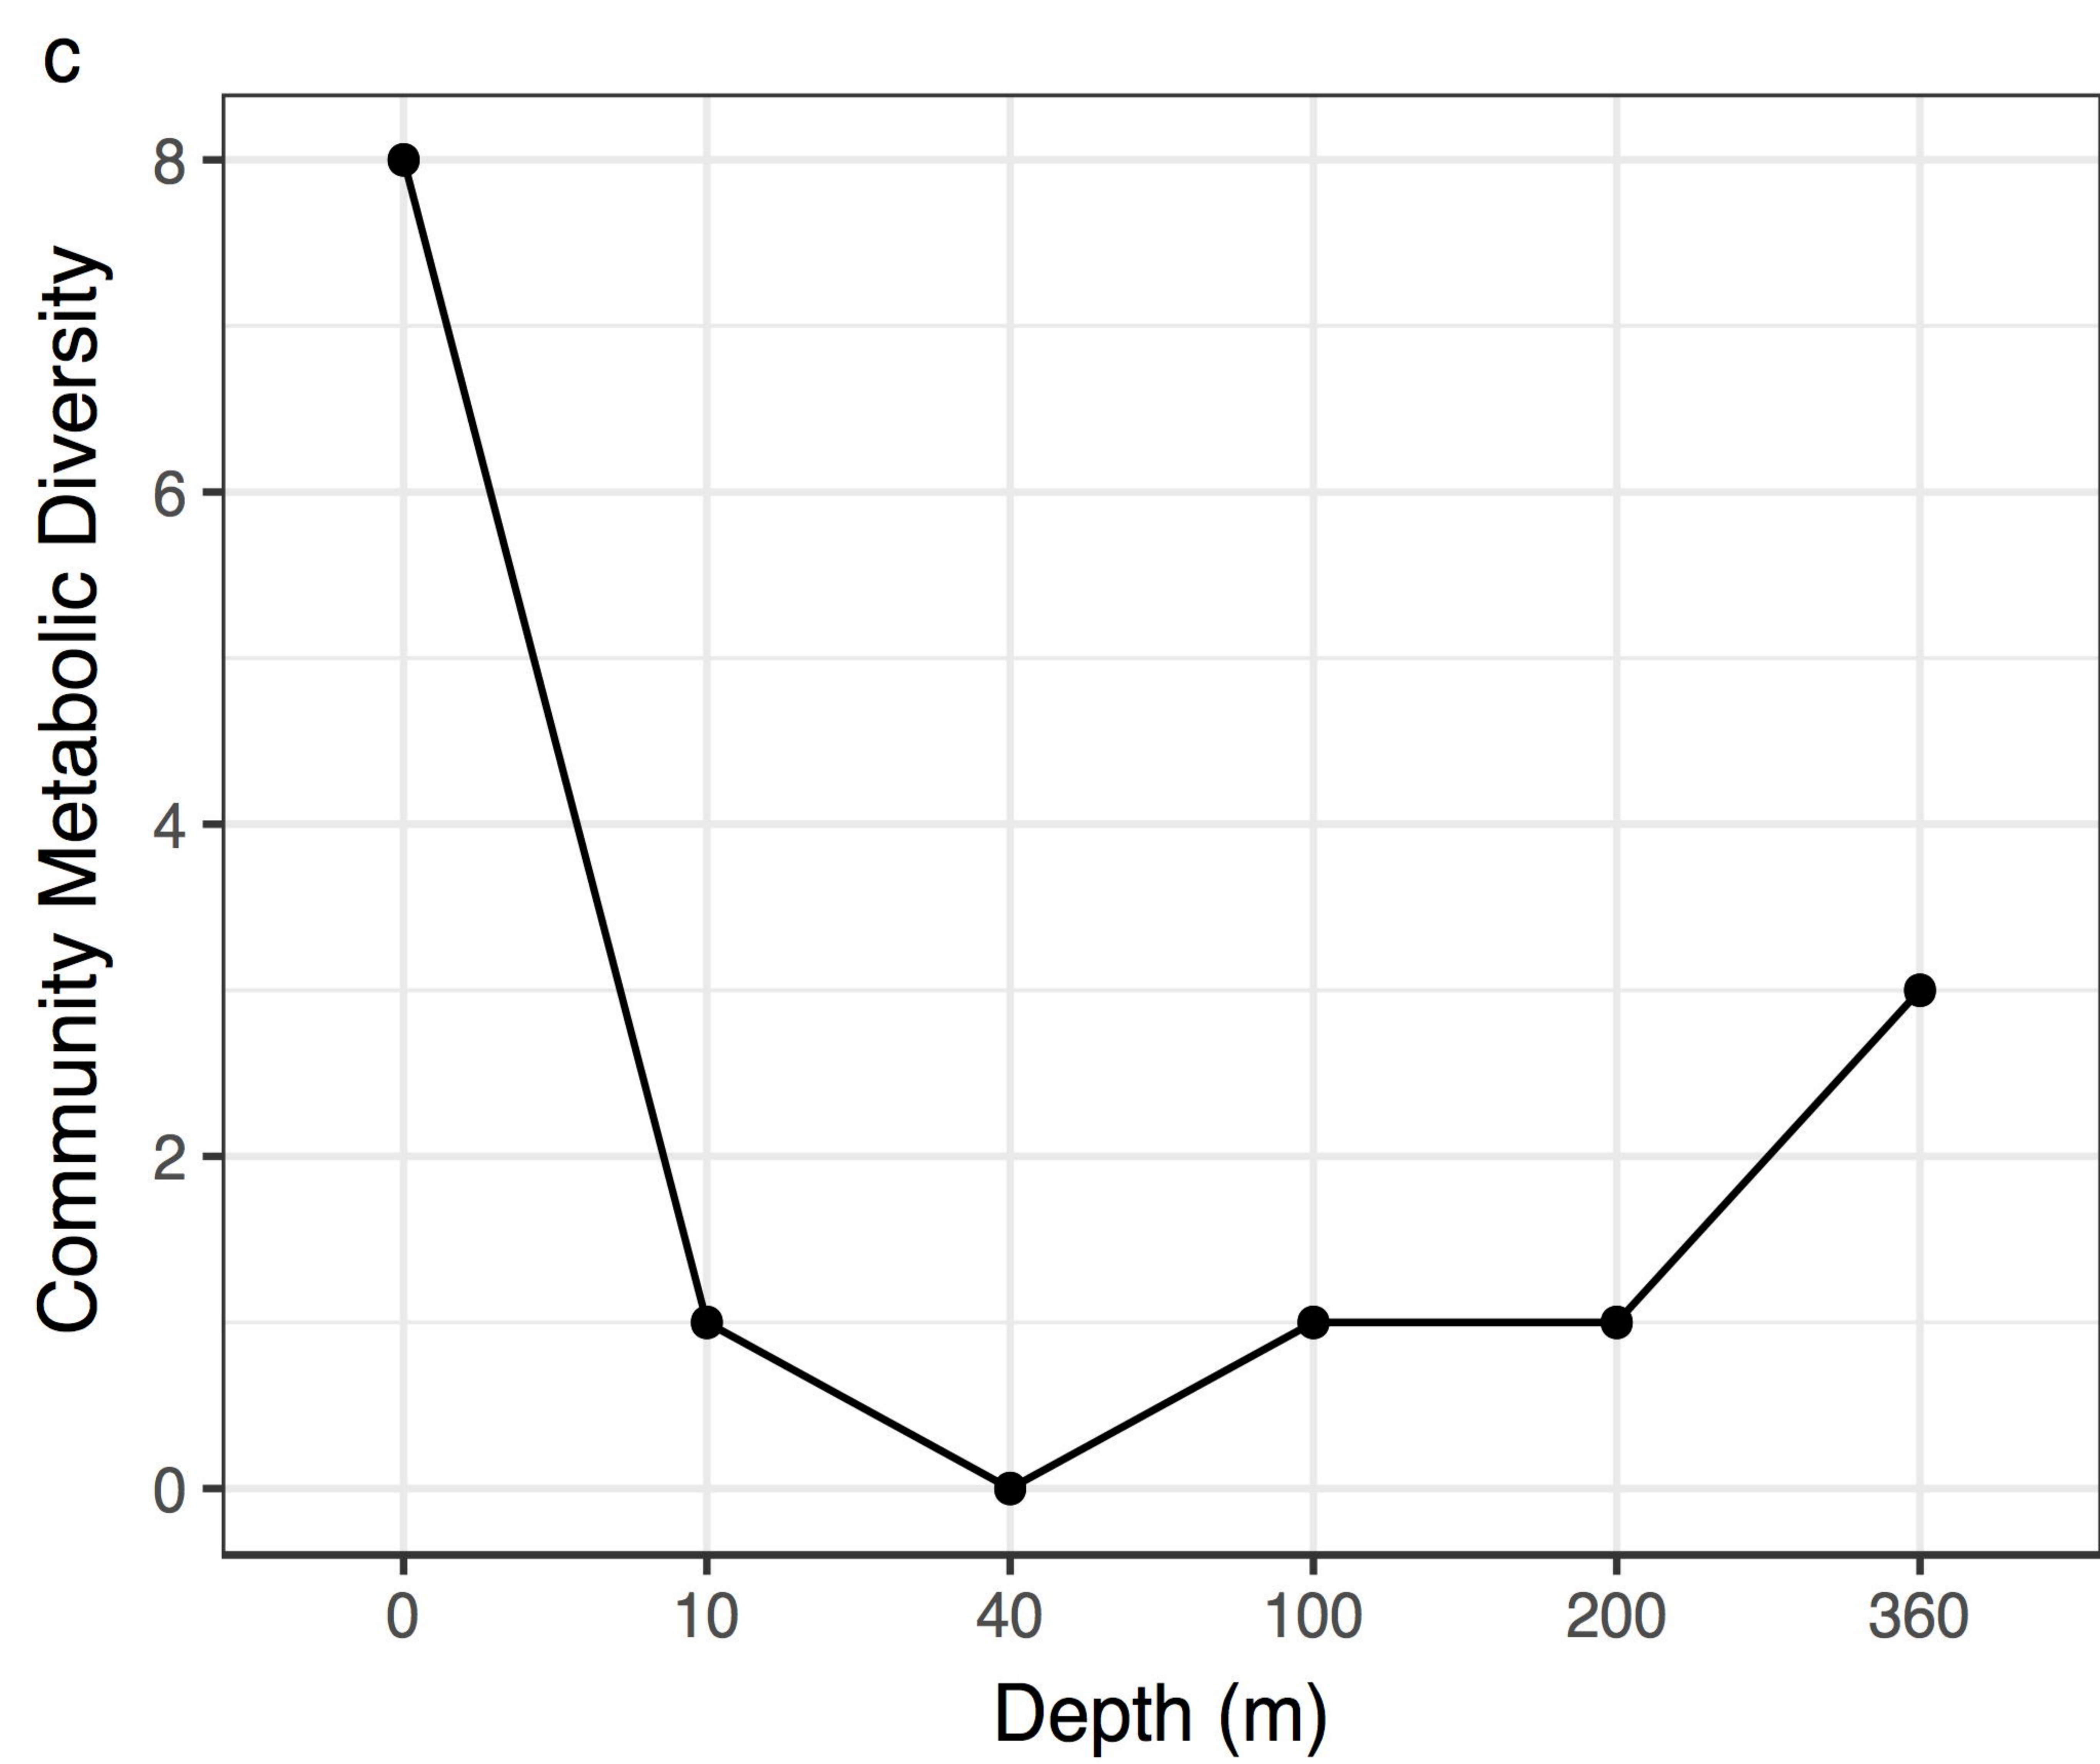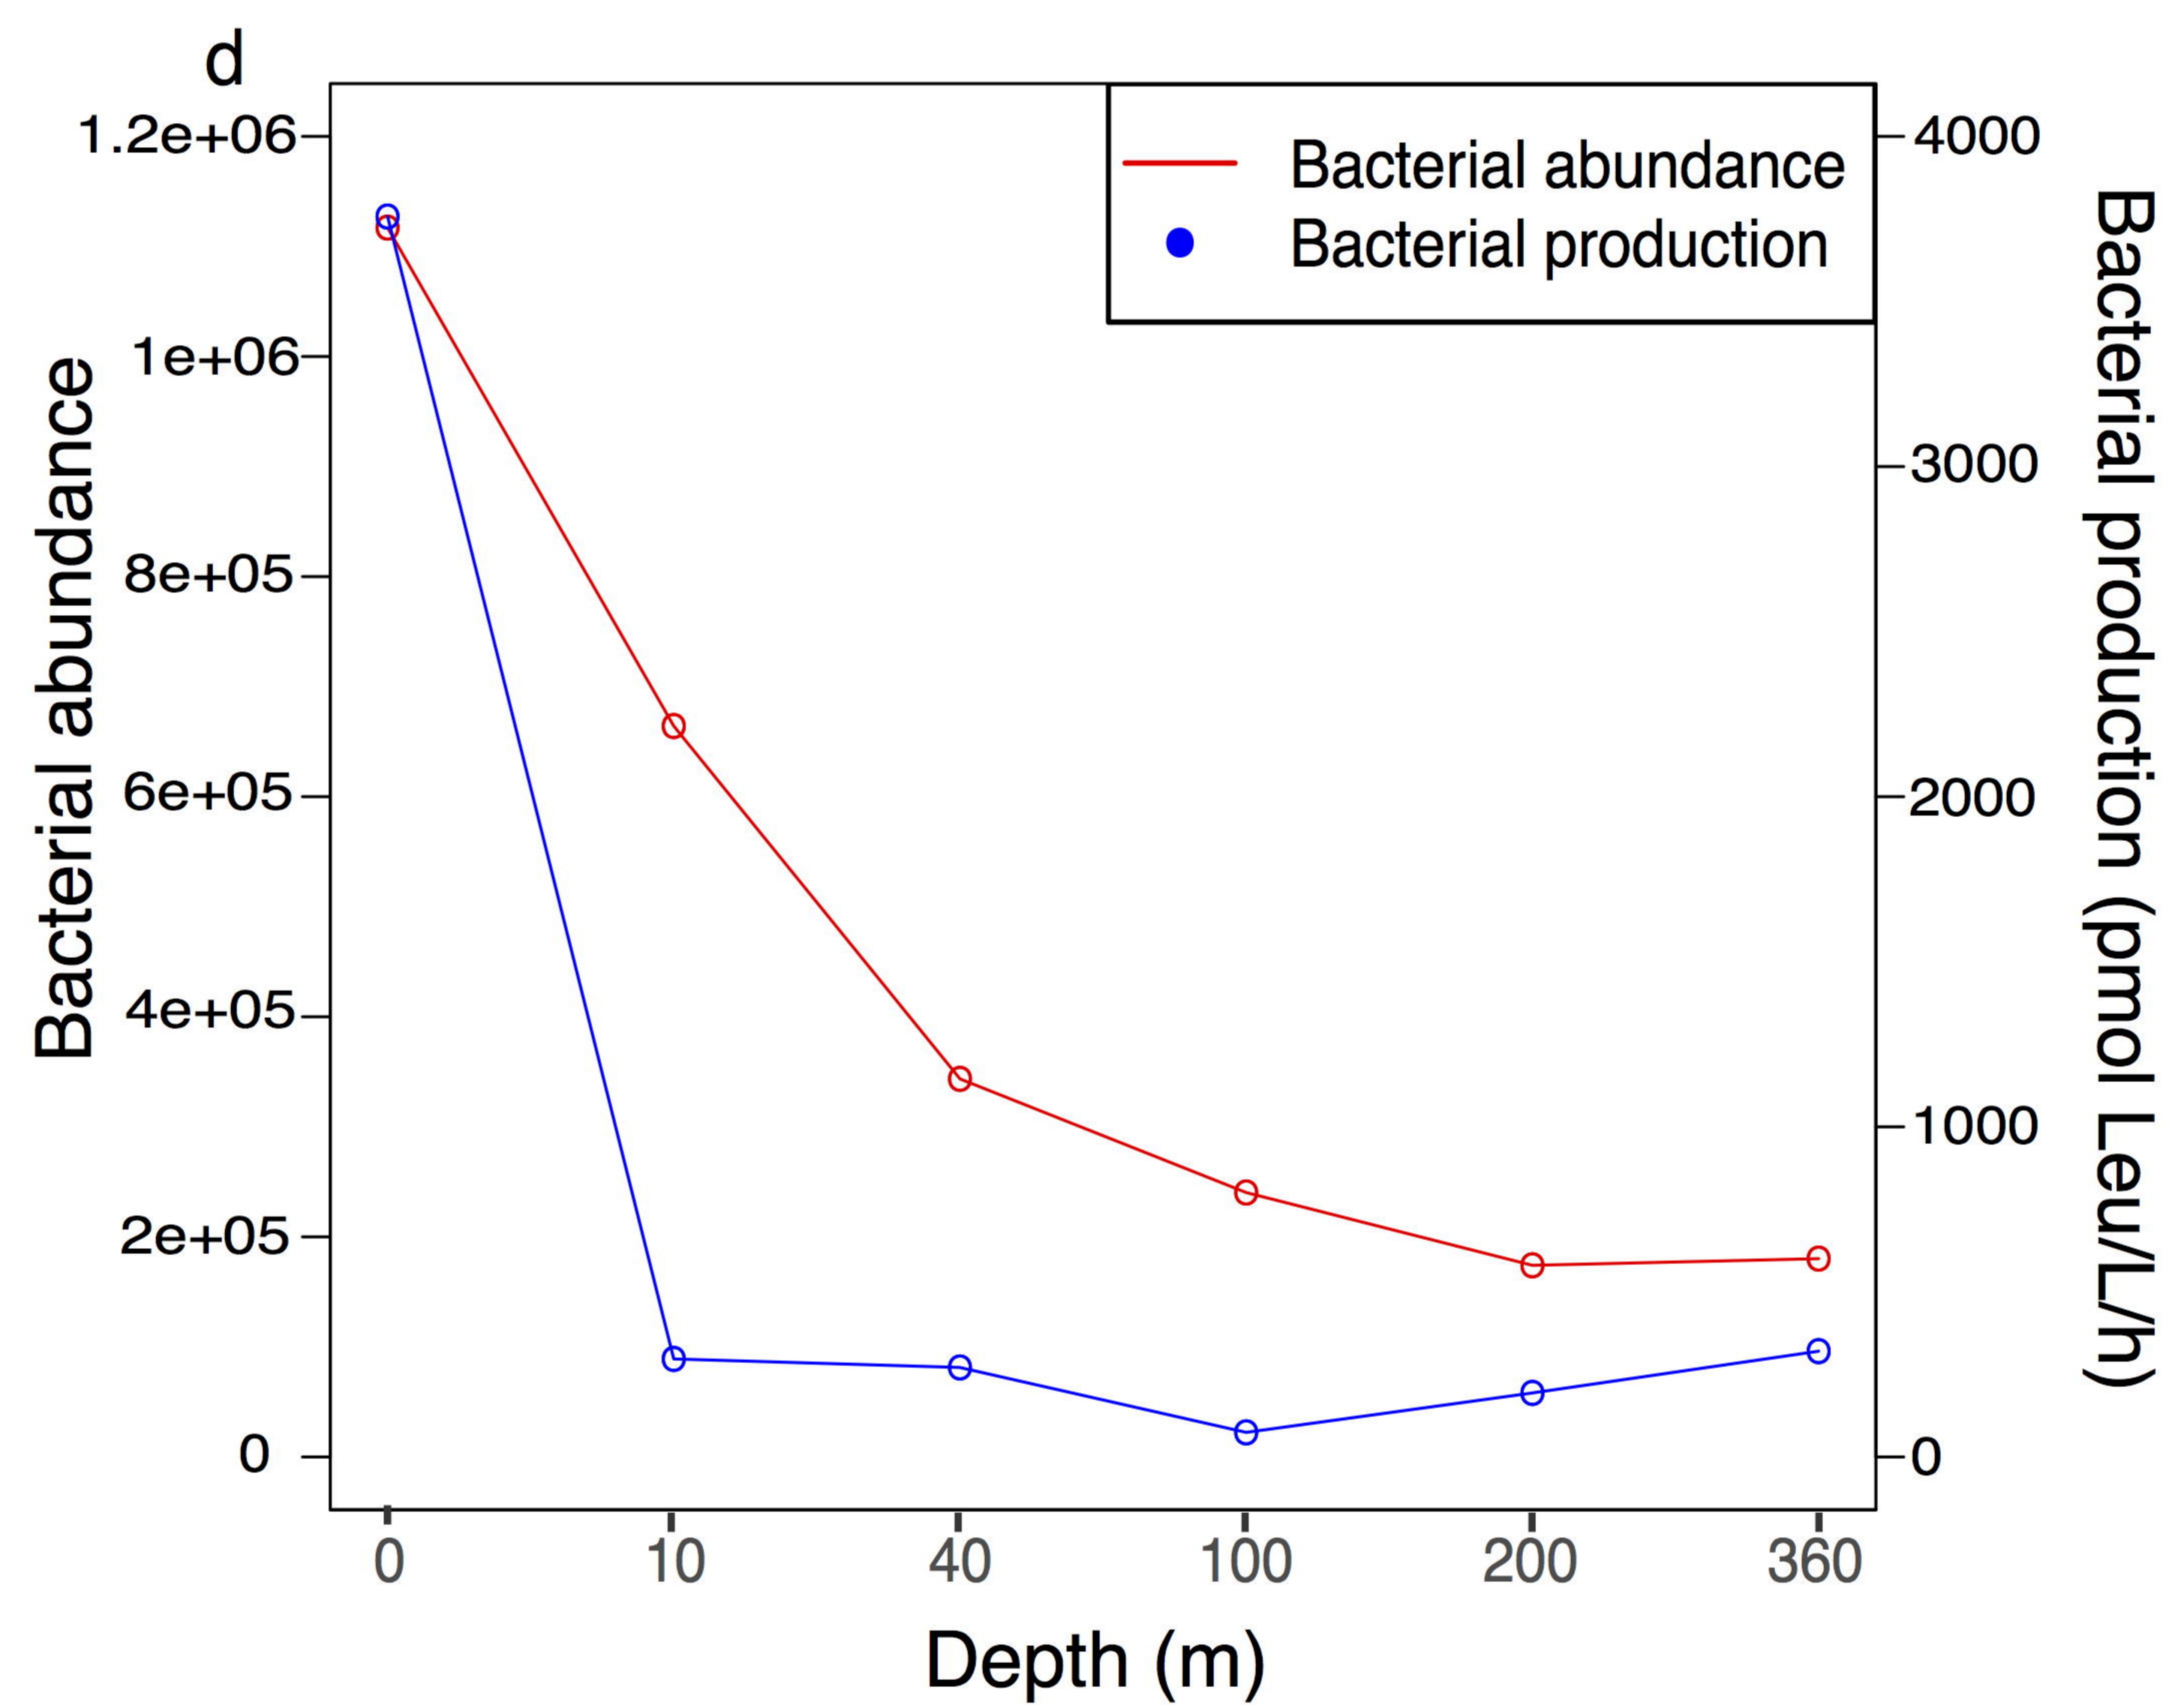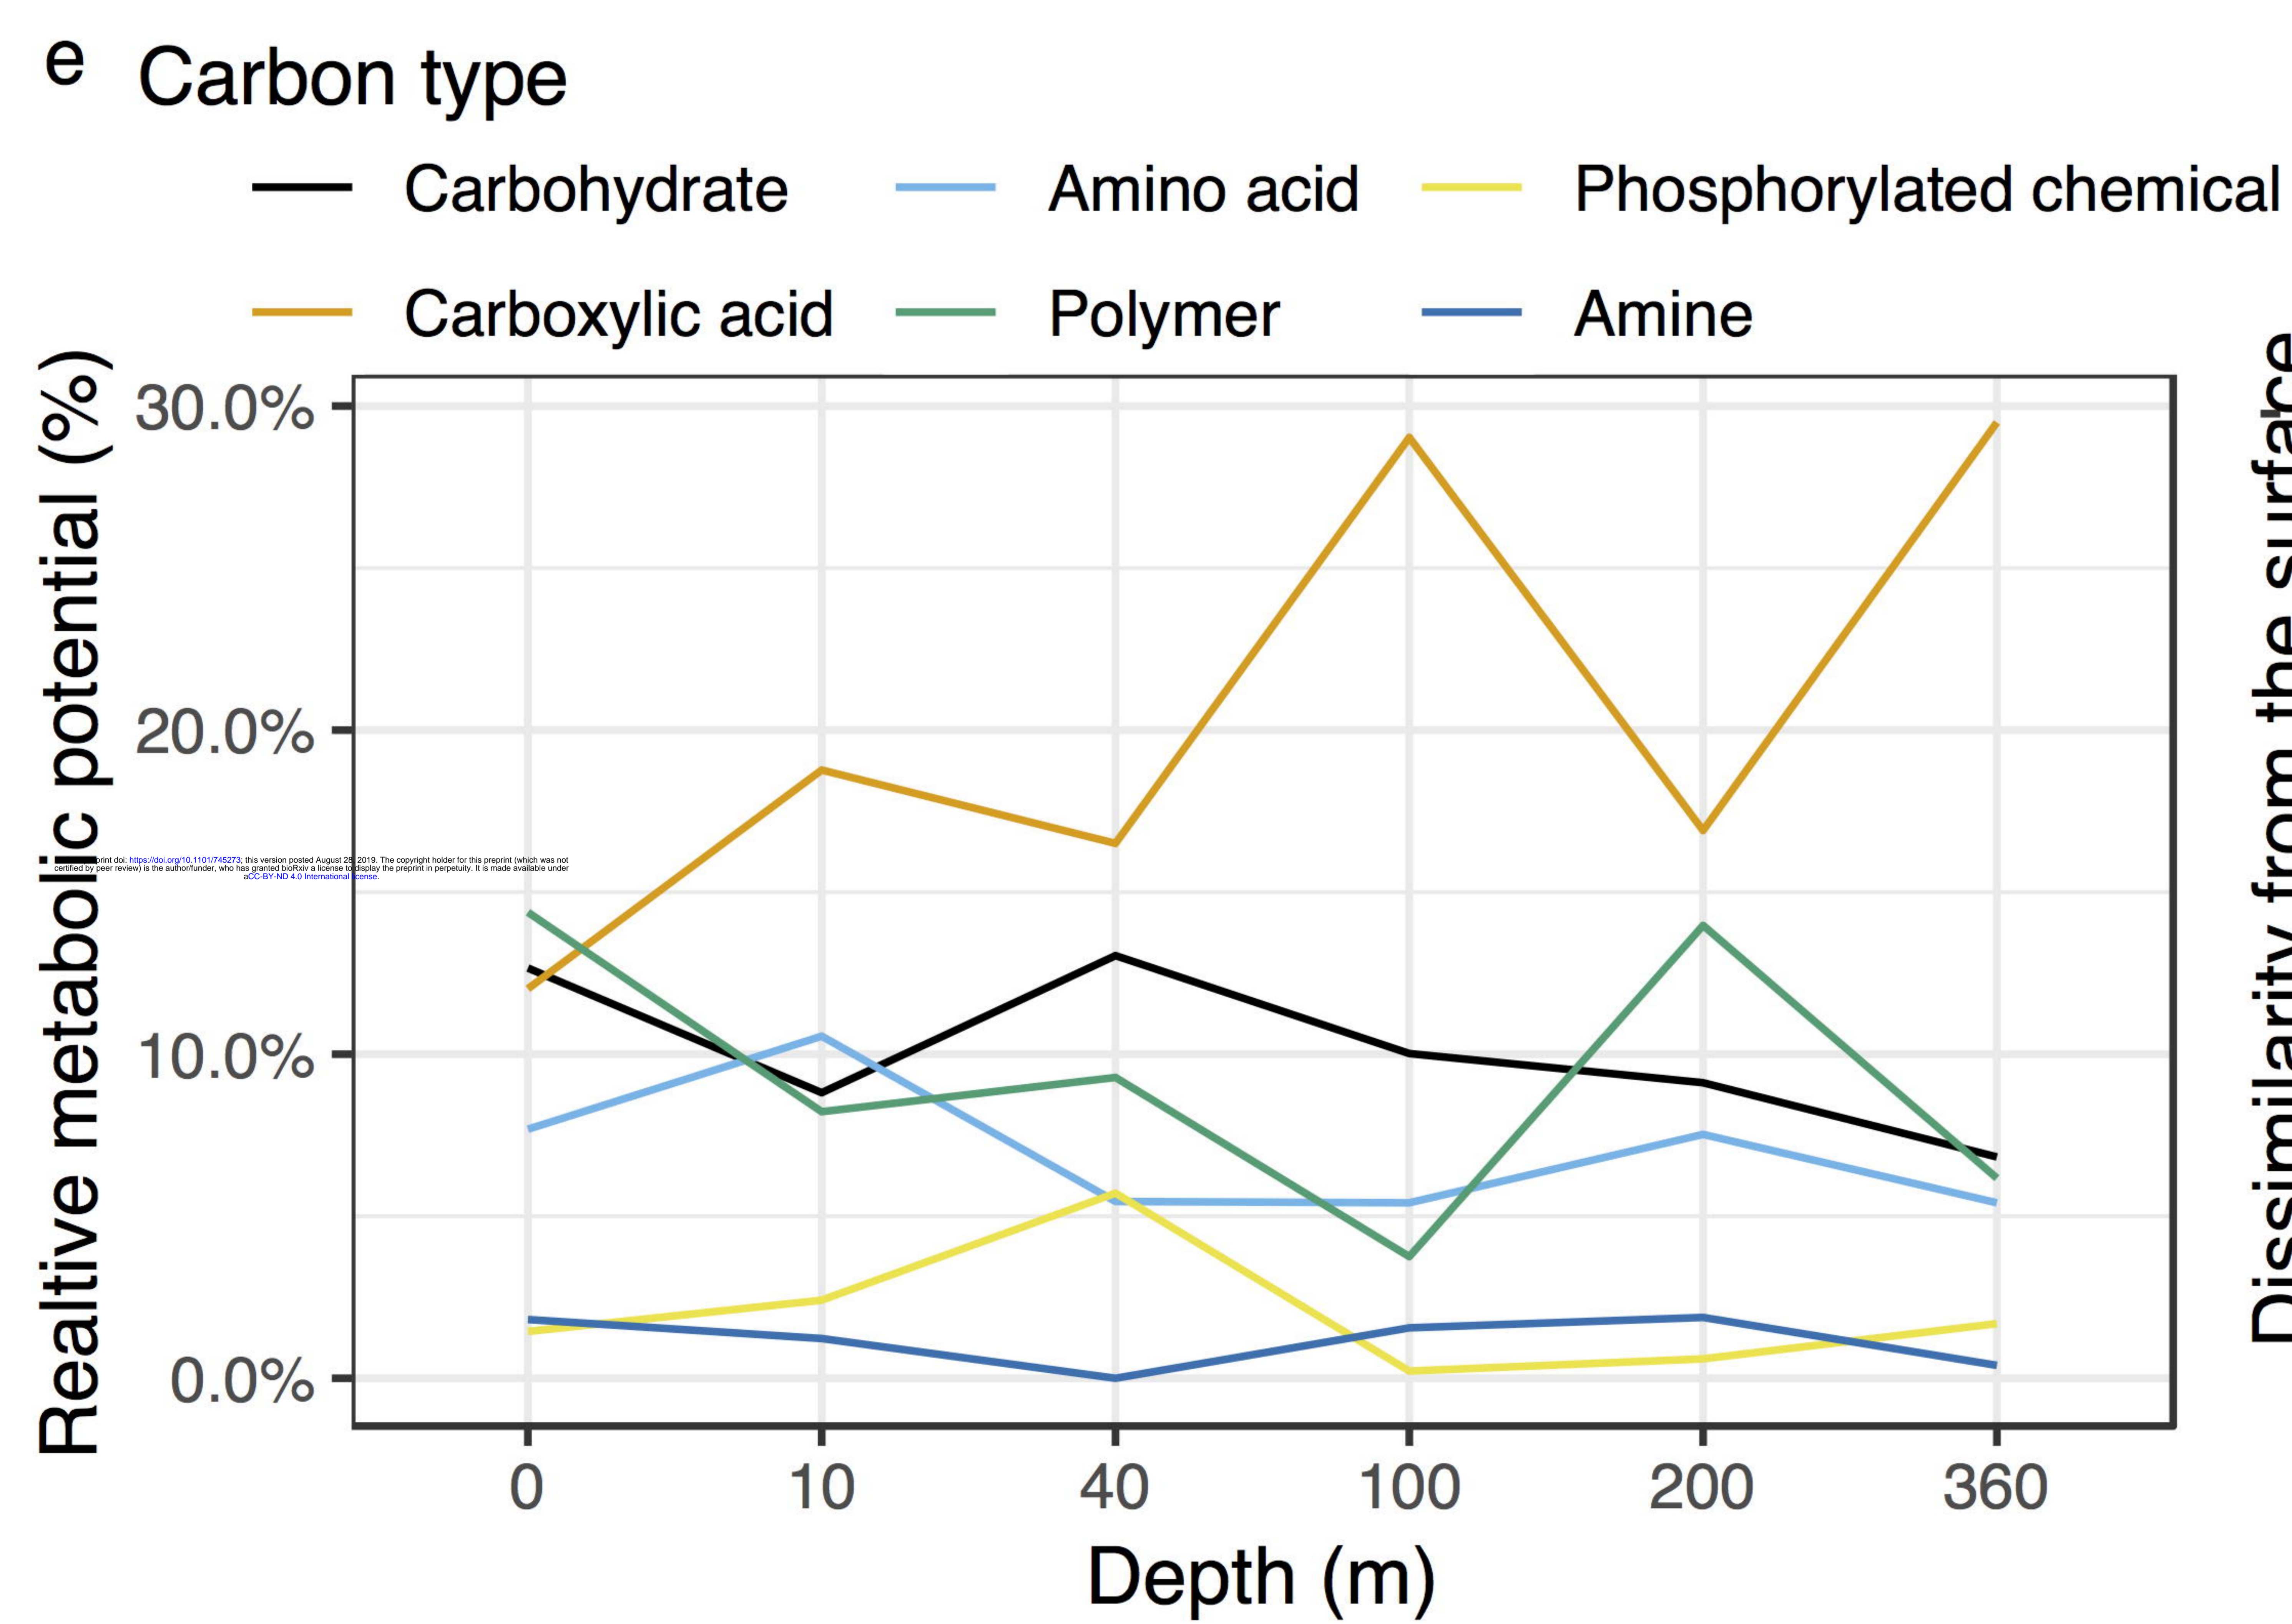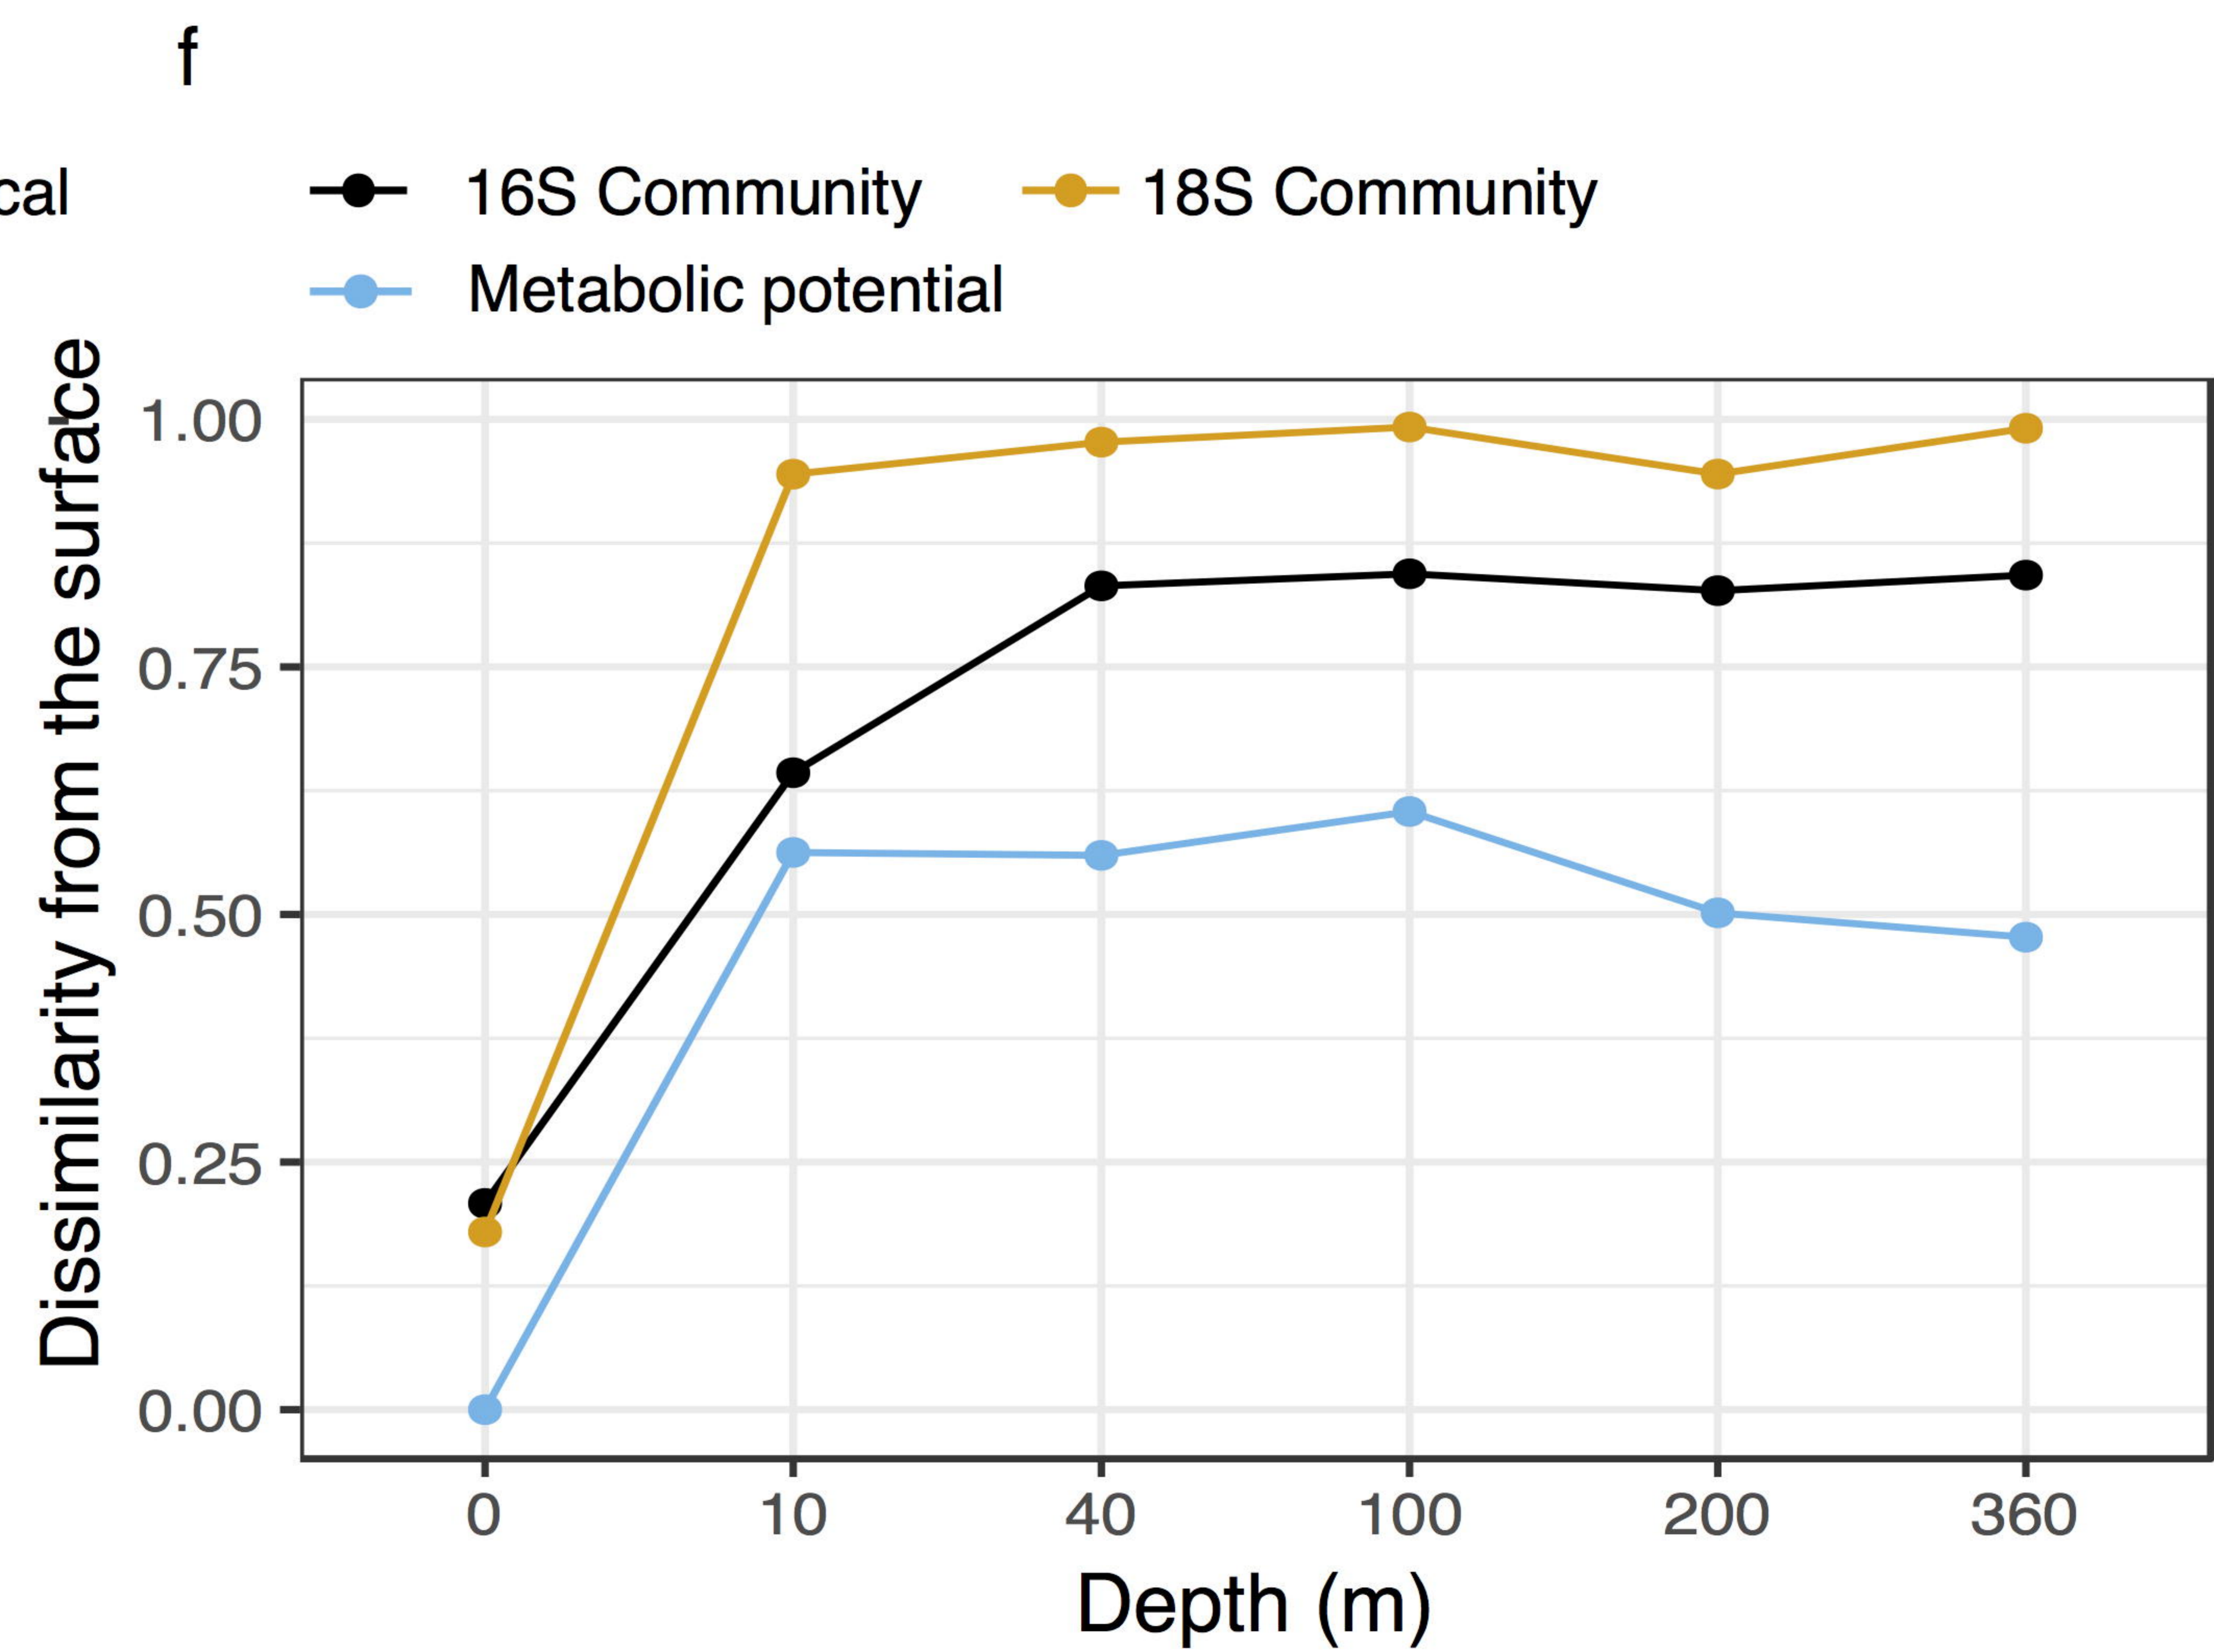

Source: https://www.biorxiv.org/content/10.1101/745273v1.full.pdf
